# Supplementary material for: A Whole-genome Sequencing Analysis of Neisseria gonorrhoeae Isolates in China: An Observational Study
Source: PubMed Central journal article supplement — eClinicalMedicine. 2019 Feb 14;7:47–54. doi: 10.1016/j.eclinm.2019.01.010 (PMC6537553; doi:10.1016/j.eclinm.2019.01.010), 2019-02-14
Supplement: mmc1.pdf [file mmc1.pdf]

**Table S1: Complete reference genomes used in this study**

| <b>Strain</b> | <b>Accession</b> | <b>Reference</b>                              |
|---------------|------------------|-----------------------------------------------|
| FA1090        | NC_002946        | unpublished                                   |
| MS11          | CP003909         | unpublished                                   |
| NCCP11945     | NC_011035        | Chung et al. J Bacteriol. 190:6035            |
| FA19          | CP012026         | Abrams et al. Genome Announc 3:e01052-15      |
| WHO_F         | LT591897         | Unemo et al. J Antimicrob Chemother. 71: 3096 |
| WHO_G         | LT591898         | Unemo et al. J Antimicrob Chemother. 71: 3096 |
| WHO_K         | LT591908         | Unemo et al. J Antimicrob Chemother. 71: 3096 |
| WHO_L         | LT591901         | Unemo et al. J Antimicrob Chemother. 71: 3096 |
| WHO_M         | LT591904         | Unemo et al. J Antimicrob Chemother. 71: 3096 |
| WHO_N         | LT591910         | Unemo et al. J Antimicrob Chemother. 71: 3096 |
| WHO_O         | LT592146         | Unemo et al. J Antimicrob Chemother. 71: 3096 |
| WHO_P         | LT592157         | Unemo et al. J Antimicrob Chemother. 71: 3096 |
| WHO_U         | LT592159         | Unemo et al. J Antimicrob Chemother. 71: 3096 |
| WHO_V         | LT592150         | Unemo et al. J Antimicrob Chemother. 71: 3096 |
| WHO_W         | LT592163         | Unemo et al. J Antimicrob Chemother. 71: 3096 |
| WHO_X         | LT592155         | Unemo et al. J Antimicrob Chemother. 71: 3096 |
| WHO_Y         | LT592161         | Unemo et al. J Antimicrob Chemother. 71: 3096 |
| WHO_Z         | LT592153         | Unemo et al. J Antimicrob Chemother. 71: 3096 |

**Table S2: Sequenced *Neisseria gonorrhoeae* isolates**

| Source | Phylogenetic analysis<br>(Dataset 1) | SNP analysis*<br>(Dataset 2) |
|--------|--------------------------------------|------------------------------|
| China  | 435                                  | 435                          |
| USA    | 192                                  | 186                          |
| UK     | 1867                                 | 0                            |
| WHO    | 14                                   | 14                           |
| Other  | 4                                    | 0                            |
| Total  | 2512                                 | 635                          |

\*include isolates with the information of susceptibility to ceftriaxone.

**Table S3: Characteristics of all sequenced isolates in this study**

| Sample | Province | Ceftriaxone | Spectinomycin | Ciprofloxine | TRNG | PPNG | abcZ | adk | aroE | fumC | gdh | pdhC | pgm | MLST  | penA pattern    | porB allele | tbpB allele | NG_MAST | Lineage |
|--------|----------|-------------|---------------|--------------|------|------|------|-----|------|------|-----|------|-----|-------|-----------------|-------------|-------------|---------|---------|
| NG001  | ZJ       | 0.125       | 16            | 8            | 1    | 0    | 109  | 39  | 67   | 78   | 148 | 153  | 65  | 7356  | X III           | 6073        | 4           | 10328   | L2.6    |
| NG002  | ZJ       | 0.032       | 16            | 8            | 1    | 0    | 126  | 39  | 67   | 111  | 148 | 153  | 65  | 7365  | II              | 581         | 33          | 1866    | L2.3    |
| NG003  | ZJ       | 0.016       | 16            | 8            | 1    | 0    | 126  | 39  | 67   | 158  | 148 | 153  | 65  | 1904  | 2.002 (partial) | 6061        | 33          | 10315   | L2.3    |
| NG004  | ZJ       | 0.032       | 16            | 8            | 0    | 0    | 109  | 39  | 67   | 158  | 148 | 668  | 65  | 12969 | X VIII          | 6067        | 477         | 10321   | L2.1    |
| NG005  | ZJ       | 0.032       | 16            | 8            | 1    | 0    | 59   | 39  | 67   | 158  | 148 | 153  | 65  | 7827  | X IX            | 6068        | 4           | 10322   | L2.6    |
| NG006  | ZJ       | 0.016       | 16            | 8            | 0    | 1    | 109  | 39  | 67   | 111  | 148 | 153  | 133 | 7367  | X IX            | 6069        | 1036        | 10323   | L2.1    |
| NG007  | ZJ       | 0.016       | 8             | 4            | 1    | 1    | 109  | 39  | 67   | 78   | 148 | 153  | 65  | 7356  | X III           | 4           | 752         | 4539    | L2.6    |
| NG008  | ZJ       | 0.016       | 16            | 4            | 0    | 1    | 59   | 39  | 67   | 158  | 148 | 153  | 65  | 7827  | X IX            | 1448        | 4           | 4846    | L2.6    |
| NG009  | ZJ       | 0.016       | 16            | 8            | 1    | 1    | 109  | 39  | 67   | 111  | 148 | 153  | 133 | 7367  | II              | 1135        | 1093        | 5161    | L2.9    |
| NG010  | ZJ       | 0.016       | 16            | 4            | 1    | 0    | 435  | 39  | 67   | 111  | 148 | 153  | 65  | 12515 | II              | 581         | 479         | 10407   | L2.3    |
| NG011  | ZJ       | 0.008       | 16            | 4            | 0    | 1    | 59   | 39  | 67   | 158  | 148 | 153  | 65  | 7827  | X IX            | 1448        | 4           | 4846    | L2.6    |
| NG012  | ZJ       | 0.032       | 16            | 8            | 0    | 1    | 109  | 39  | 67   | 111  | 148 | 153  | 65  | 1579  | X III           | 6071        | 110         | 10325   | L2.1    |
| NG013  | ZJ       | 0.032       | 16            | 8            | 1    | 1    | 126  | 39  | 67   | 111  | 148 | 153  | 65  | 7365  | X XI            | 3531        | 110         | 10408   | L2.2    |
| NG014  | ZJ       | 0.5         | 16            | 8            | 0    | 0    | 109  | 39  | 67   | 111  | 148 | 153  | 65  | 1579  | X X X IV        | 6076        | 110         | 10332   | L2.1    |
| NG015  | ZJ       | 0.032       | 16            | 4            | 0    | 0    | 59   | 39  | 67   | 158  | 148 | 153  | 65  | 7827  | X III           | 6077        | 4           | 10333   | L2.4    |
| NG016  | ZJ       | 0.125       | 16            | 8            | 0    | 1    | 59   | 39  | 67   | 78   | 147 | 154  | 65  | 11231 | X VIII          | 6059        | 33          | 10313   | L2.2    |
| NG017  | ZJ       | 0.125       | 16            | 8            | 1    | 0    | 126  | 39  | 67   | 78   | 148 | 153  | 65  | 1600  | X III           | 543         | 33          | 809     | L2.2    |
| NG018  | ZJ       | 0.125       | 16            | 8            | 1    | 1    | 126  | 39  | 67   | 78   | 148 | 153  | 65  | 1600  | X VIII          | 6063        | 186         | 10317   | L2.5    |
| NG019  | ZJ       | 0.125       | 32            | 8            | 1    | 0    | 59   | 39  | 67   | 78   | 147 | 154  | 65  | 11231 | X VIII          | 6064        | 4           | 10318   | L2.2    |
| NG020  | ZJ       | 0.125       | 16            | 8            | 0    | 0    | 59   | 39  | 67   | 158  | 148 | 153  | 65  | 7827  | X III           | 6073        | 4           | 10328   | L2.4    |
| NG021  | ZJ       | 0.125       | 16            | 8            | 0    | 1    | 126  | 39  | 67   | 111  | 148 | 153  | 65  | 7365  | X III           | 1053        | 21          | 3435    | L2.5    |
| NG022  | ZJ       | 0.032       | 8             | 8            | 1    | 0    | 126  | 39  | 67   | 78   | 148 | 153  | 65  | 1600  | X XI            | 6065        | 737         | 10319   | L2.2    |
| NG023  | SH       | 0.06        | 8             | 32           | 0    | 0    | 109  | 39  | 67   | 111  | 148 | 153  | 133 | 7367  | X VIII          | 580         | 1070        | 10384   | L2.9    |
| NG024  | SH       | 0.06        | 16            | 8            | 1    | 0    | 126  | 39  | 67   | 78   | 148 | 153  | 65  | 1600  | X III           | 206         | 75          | 2135    | L2.2    |
| NG025  | SH       | 0.125       | 16            | 8            | 1    | 0    | 126  | 39  | 67   | 78   | 148 | 153  | 65  | 1600  | X III           | 1496        | 1827        | 10269   | L2.2    |
| NG026  | SH       | 0.125       | 32            | 16           | 0    | 1    | 109  | 39  | 67   | 111  | 148 | 153  | 133 | 7367  | X III           | 6026        | 1036        | 10270   | L2.1    |
| NG027  | SH       | 0.06        | 8             | 8            | 0    | 1    | 109  | 39  | 67   | 158  | 148 | 153  | 65  | 9304  | X VIII          | 2035        | 526         | 3356    | L2.1    |
| NG028  | SH       | 0.125       | 32            | 16           | 1    | 1    | 59   | 39  | 67   | 158  | 148 | 153  | 65  | 7827  | X III           | 1053        | 4           | 2318    | L2.4    |
| NG029  | SH       | 0.06        | 32            | 8            | 1    | 1    | 59   | 39  | 67   | 111  | 148 | 153  | 65  | 1583  | X III           | 90          | 1829        | 10272   | L2.2    |
| NG030  | SH       | 0.06        | 16            | 16           | 1    | 0    | 126  | 39  | 67   | 78   | 148 | 153  | 65  | 1600  | X XI            | 1275        | 737         | 10343   | L2.2    |
| NG031  | SH       | 0.125       | 32            | 16           | 0    | 1    | 59   | 39  | 67   | 78   | 147 | 154  | 65  | 11231 | X VIII          | 1053        | 4           | 2318    | L2.2    |
| NG032  | SH       | 0.06        | 16            | 16           | 0    | 1    | 59   | 39  | 67   | 111  | 147 | 154  | 65  | 12970 | X VIII          | 543         | 1830        | 10273   | L2.2    |
| NG033  | SH       | 0.06        | 8             | 8            | 0    | 0    | 435  | 39  | 67   | 158  | 148 | 153  | 65  | 12971 | X III           | 246         | 4           | 10386   | L2.4    |
| NG034  | SH       | 0.125       | 16            | 8            | 0    | 1    | 109  | 39  | 67   | 111  | 148 | 153  | 65  | 1579  | X X VIII        | 908         | 110         | 1407    | L2.1    |
| NG035  | SH       | 0.06        | 16            | 16           | 0    | 0    | 59   | 39  | 67   | 158  | 148 | 153  | 65  | 7827  | X III           | 6037        | 4           | 10285   | L2.4    |
| NG036  | SH       | 0.06        | 16            | 16           | 0    | 0    | 109  | 39  | 67   | 111  | 147 | 153  | 65  | 6960  | X VIII          | 182         | 1473        | 7856    | L2.1    |
| NG037  | SH       | 0.06        | 16            | 4            | 0    | 0    | 109  | 39  | 67   | 78   | 148 | 153  | 65  | 7356  | X III           | 1053        | 4           | 2318    | L2.6    |
| NG038  | SH       | 0.125       | 16            | 16           | 0    | 1    | 109  | 39  | 67   | 78   | 147 | 154  | 65  | 12972 | X III           | 2922        | 156         | 4831    | L2.2    |
| NG039  | SH       | 0.06        | 16            | 8            | 0    | 0    | 59   | 39  | 67   | 158  | 148 | 153  | 65  | 7827  | X III           | 6028        | 1831        | 10275   | L2.4    |
| NG040  | SH       | 0.03        | 32            | 32           | 0    | 0    | 59   | 39  | 67   | 78   | 148 | 153  | 65  | 7363  | XII/ X X X VI   | 2978        | 1058        | 5061    | L2.6    |
| NG041  | SH       | 0.03        | 16            | 16           | 1    | 0    | 126  | 39  | 67   | 78   | 148 | 153  | 65  | 1600  | X XI            | 1275        | 737         | 10343   | L2.2    |
| NG042  | SH       | 0.016       | 16            | 8            | 1    | 0    | 126  | 39  | 67   | 111  | 148 | 153  | 65  | 7365  | II              | 6027        | 33          | 10274   | L2.3    |
| NG043  | GX       | 0.125       | 8             | 8            | 0    | 0    | 109  | 39  | 67   | 78   | 148 | 153  | 65  | 7356  | X III           | 4           | 752         | 4539    | L2.6    |
| NG044  | GX       | 0.125       | 32            | 16           | 1    | 1    | 59   | 112 | 67   | 157  | 148 | 153  | 65  | 11191 | X III           | 581         | 33          | 1866    | L2.7    |
| NG045  | GX       | 0.125       | 16            | 8            | 1    | 1    | 126  | 39  | 67   | 111  | 148 | 153  | 65  | 7365  | II              | 251         | 483         | 1927    | L2.3    |
| NG046  | GX       | 0.125       | 16            | 16           | 0    | 0    | 109  | 39  | 67   | 78   | 148 | 153  | 65  | 7356  | X III           | 4           | 752         | 4539    | L2.6    |
| NG047  | GX       | 0.008       | 32            | 2            | 0    | 1    | 59   | 112 | 67   | 157  | 148 | 153  | 65  | 11191 | X III           | 251         | 483         | 1927    | L2.7    |
| NG048  | GX       | 0.008       | 16            | 16           | 0    | 1    | 59   | 39  | 67   | 78   | 146 | 154  | 65  | 12973 | II              | 908         | 953         | 8426    | L2.6    |

|       |    |       |    |       |   |   |     |     |    |     |     |     |     |       |              |          |       |       |      |
|-------|----|-------|----|-------|---|---|-----|-----|----|-----|-----|-----|-----|-------|--------------|----------|-------|-------|------|
| NG049 | GX | 0.016 | 16 | 16    | 0 | 0 | 126 | 39  | 67 | 78  | 148 | 153 | 65  | 1600  | X III        | 6021     | 137   | 10260 | L2.6 |
| NG050 | GX | 0.008 | 32 | 4     | 0 | 1 | 126 | 39  | 67 | 111 | 148 | 153 | 65  | 7365  | X III        | 90       | 1077  | 5096  | L2.2 |
| NG051 | GX | 0.004 | 16 | 4     | 0 | 0 | 59  | 39  | 67 | 158 | 148 | 153 | 65  | 7827  | X III        | 6023     | 21    | 10263 | L2.4 |
| NG052 | GX | 0.03  | 32 | 16    | 1 | 1 | 435 | 39  | 67 | 111 | 148 | 153 | 65  | 12515 | X XI         | 328      | 913   | 10381 | L2.3 |
| NG053 | GX | 0.03  | 32 | 16    | 0 | 0 | 59  | 39  | 67 | 111 | 148 | 154 | 65  | 8109  | X XI         | 242      | 1825  | 10266 |      |
| NG054 | GX | 0.03  | 16 | 16    | 1 | 0 | 126 | 39  | 67 | 111 | 149 | 71  | 65  | 6714  | X XI         | 206      | 156   | 421   | L2.5 |
| NG055 | GX | 0.008 | 8  | 16    | 1 | 1 | 126 | 39  | 67 | 78  | 149 | 71  | 65  | 1927  | X XI         | 3099     | 156   | 7154  | L2.5 |
| NG056 | GX | 0.03  | 16 | 16    | 1 | 0 | 59  | 39  | 67 | 158 | 148 | 154 | 65  | 12974 | XII/X X X VI | 4700     | 580   | 10382 | L2.4 |
| NG057 | GX | 0.03  | 16 | 16    | 0 | 1 | 126 | 39  | 67 | 78  | 149 | 71  | 65  | 1927  | II           | 5924     | 156   | 10342 | L2.5 |
| NG058 | GX | 0.06  | 16 | 8     | 0 | 1 | 59  | 39  | 67 | 158 | 148 | 153 | 65  | 7827  | X III        | 1053     | 4     | 2318  | L2.4 |
| NG059 | GX | 0.06  | 8  | 2     | 0 | 0 | 109 | 39  | 67 | 78  | 149 | 153 | 65  | 8157  | X XII        | 6020     | 278   | 10247 | L2.6 |
| NG060 | GX | 0.25  | 8  | 16    | 0 | 0 | 59  | 39  | 67 | 78  | 148 | 153 | 65  | 7363  | X/X X X V    | 917      | 10    | 1424  | L2.8 |
| NG061 | GX | 0.06  | 16 | 4     | 0 | 0 | 59  | 39  | 67 | 78  | 148 | 153 | 65  | 7363  | 44.001       | 581      | 563   | 10380 | L2.6 |
| NG062 | TJ | 0.125 | 16 | 32    | 0 | 0 | 59  | 39  | 67 | 78  | 148 | 153 | 65  | 7363  | X/X X X V    | 917      | 10    | 1424  | L2.8 |
| NG063 | TJ | 0.016 | 16 | 4     | 0 | 1 | 59  | 112 | 67 | 157 | 148 | 153 | 65  | 11191 | X III        | 251      | 1833  | 10290 | L2.7 |
| NG064 | TJ | 0.032 | 16 | 16    | 0 | 0 | 59  | 39  | 67 | 158 | 148 | 153 | 65  | 7827  | X III        | 1132     | 1834  | 10291 | L2.4 |
| NG065 | TJ | 0.008 | 16 | 4     | 0 | 0 | 59  | 112 | 67 | 157 | 148 | 153 | 65  | 11191 | X III        | 251      | 1833  | 10290 | L2.7 |
| NG066 | TJ | 0.032 | 16 | 16    | 0 | 0 | 59  | 39  | 67 | 111 | 148 | 153 | 65  | 1583  | X VIII       | 6042     | 328   | 10292 | L2.1 |
| NG067 | TJ | 0.032 | 16 | 8     | 1 | 0 | 109 | 39  | 67 | 158 | 148 | 153 | 65  | 9304  | X VIII       | 581      | 33    | 1866  | L2.1 |
| NG068 | TJ | 0.016 | 16 | 8     | 0 | 0 | 126 | 39  | 67 | 111 | 148 | 153 | 65  | 7365  | II           | 2035     | 1835  | 10294 | L2.3 |
| NG069 | TJ | 0.016 | 16 | 8     | 1 | 1 | 126 | 39  | 67 | 111 | 148 | 153 | 65  | 7365  | X III        | 6044     | 75    | 10295 | L2.3 |
| NG070 | TJ | 0.016 | 16 | 8     | 1 | 1 | 126 | 39  | 67 | 111 | 148 | 153 | 65  | 7365  | X III        | 489      | 75    | 10344 | L2.3 |
| NG071 | TJ | 0.016 | 8  | 2     | 0 | 0 | 126 | 39  | 67 | 78  | 148 | 153 | 133 | 8126  | X III        | 1053     | 75    | 10346 | L2.6 |
| NG072 | TJ | 0.032 | 16 | 8     | 0 | 0 | 59  | 39  | 67 | 78  | 148 | 153 | 65  | 7363  | 44.001       | 130      | 1836  | 10296 | L2.6 |
| NG073 | TJ | 0.008 | 16 | 8     | 1 | 1 | 126 | 39  | 67 | 111 | 148 | 153 | 133 | 1580  | II           | 6045     | 186   | 10297 | L2.3 |
| NG074 | TJ | 0.032 | 8  | 8     | 0 | 0 | 59  | 39  | 67 | 158 | 148 | 153 | 65  | 7827  | X III        | 1132     | 4     | 2083  | L2.4 |
| NG075 | TJ | 0.016 | 16 | 2     | 0 | 1 | 59  | 39  | 67 | 78  | 147 | 154 | 65  | 11231 | II           | 833      | 33    | 1410  | L2.2 |
| NG076 | TJ | 0.032 | 16 | 8     | 0 | 0 | 59  | 39  | 67 | 78  | 148 | 153 | 65  | 7363  | 44.001       | 130      | 1837  | 10298 | L2.6 |
| NG078 | TJ | 0.125 | 16 | 16    | 0 | 0 | 109 | 39  | 67 | 78  | 148 | 153 | 65  | 7356  | X VIII       | 2103     | 4     | 10392 | L2.6 |
| NG079 | TJ | 0.125 | 16 | 16    | 0 | 0 | 109 | 39  | 67 | 111 | 147 | 153 | 65  | 6960  | X VIII       | 182      | 1473  | 7856  | L2.1 |
| NG080 | CQ | 0.125 | 32 | 4     | 1 | 0 | 59  | 39  | 67 | 158 | 148 | 153 | 65  | 7827  | X IX         | 1448     | 1931  | 11109 | L2.6 |
| NG081 | CQ | 0.015 | 8  | 8     | 0 | 1 | 59  | 39  | 67 | 158 | 148 | 153 | 65  | 7827  | X III        | 83%-1032 | 99%-4 | 1931  | L2.4 |
| NG082 | CQ | 0.125 | 32 | 8     | 0 | 0 | 59  | 39  | 67 | 78  | 148 | 153 | 65  | 7363  | X/X X X V    | 6479     | 21    | 11114 | L2.6 |
| NG083 | CQ | 0.06  | 16 | 16    | 1 | 1 | 126 | 39  | 67 | 111 | 146 | 153 | 65  | 9902  | V            | 6480     | 858   | 11115 | L2.1 |
| NG084 | CQ | 0.06  | 16 | 16    | 1 | 0 | 59  | 39  | 67 | 158 | 148 | 153 | 65  | 7827  | X III        | 1053     | 4     | 2318  | L2.4 |
| NG085 | CQ | 0.03  | 16 | 4     | 1 | 0 | 59  | 39  | 67 | 158 | 148 | 153 | 65  | 7827  | X III        | 6481     | 21    | 11117 | L2.6 |
| NG086 | CQ | 0.25  | 32 | 16    | 1 | 0 | 126 | 39  | 67 | 111 | 146 | 153 | 65  | 9902  | V            | 6480     | 858   | 11115 | L2.1 |
| NG087 | CQ | 0.125 | 32 | 16    | 0 | 0 | 109 | 39  | 67 | 111 | 148 | 153 | 133 | 7367  | II           | 3029     | 1036  | 5062  | L2.1 |
| NG088 | CQ | 0.03  | 8  | 16    | 0 | 0 | 59  | 39  | 67 | 111 | 148 | 153 | 65  | 1583  | X VIII       | 6482     | 137   | 11118 | L2.1 |
| NG089 | CQ | 0.06  | 16 | 16    | 0 | 1 | 126 | 39  | 67 | 111 | 148 | 153 | 65  | 7365  | X III        | 5228     | 21    | 11119 | L2.5 |
| NG090 | CQ | 0.125 | 16 | 16    | 0 | 0 | 59  | 39  | 67 | 158 | 148 | 153 | 65  | 7827  | X IX         | 1448     | 4     | 4846  | L2.6 |
| NG091 | CQ | 0.03  | 16 | 8     | 0 | 0 | 59  | 39  | 67 | 78  | 148 | 153 | 65  | 7363  | X/X X X V    | 6479     | 21    | 11114 | L2.6 |
| NG092 | CQ | 0.03  | 16 | 16    | 1 | 1 | 59  | 39  | 67 | 158 | 148 | 153 | 65  | 7827  | X III        | 1132     | 4     | 2083  | L2.4 |
| NG093 | CQ | 0.125 | 16 | 16    | 1 | 1 | 59  | 39  | 67 | 158 | 148 | 153 | 65  | 7827  | X III        | 1053     | 4     | 2318  | L2.4 |
| NG094 | CQ | 0.004 | 4  | 0.015 | 0 | 0 | 59  | 39  | 67 | 158 | 148 | 153 | 65  | 7827  | X III        | 6481     | 21    | 11117 | L2.6 |
| NG095 | CQ | 0.06  | 16 | 4     | 0 | 1 | 126 | 39  | 67 | 111 | 148 | 153 | 65  | 7365  | XII/X X X VI | 1135     | 75    | 2780  | L2.2 |
| NG096 | CQ | 0.03  | 16 | 4     | 0 | 0 | 126 | 39  | 67 | 111 | 148 | 153 | 65  | 7365  | XII/X X X VI | 1135     | 75    | 2780  | L2.2 |
| NG097 | CQ | 0.06  | 32 | 4     | 1 | 0 | 109 | 39  | 67 | 158 | 148 | 153 | 65  | 9304  | X VIII       | 90       | 477   | 4022  | L2.1 |
| NG098 | CQ | 0.015 | 16 | 4     | 1 | 0 | 59  | 39  | 67 | 158 | 148 | 153 | 65  | 7827  | X IX         | 1448     | 4     | 4846  | L2.6 |
| NG099 | CQ | 0.004 | 16 | 8     | 1 | 0 | 59  | 39  | 67 | 158 | 148 | 153 | 65  | 7827  | X III        | 95%-1067 | 4     | 2083  | L2.4 |



|       |       |       |    |     |   |   |     |     |    |     |     |     |     |       |                  |          |      |       |      |
|-------|-------|-------|----|-----|---|---|-----|-----|----|-----|-----|-----|-----|-------|------------------|----------|------|-------|------|
| NG100 | CQ    | 0.06  | 16 | 8   | 1 | 1 | 126 | 39  | 67 | 78  | 148 | 153 | 65  | 1600  | X III            | 1132     | 186  | 2422  | L2.2 |
| NG101 | XJ    | 0.016 | 8  | 2   | 0 | 0 | 59  | 39  | 67 | 158 | 148 | 153 | 65  | 7827  | X IX             | 6563     | 4    | 11270 | L2.6 |
| NG102 | XJ    | 0.03  | 4  | 16  | 0 | 0 | 109 | 39  | 67 | 111 | 146 | 153 | 65  | 8151  | X VII            | 6564     | 367  | 11271 | L2.5 |
| NG103 | XJ    | 0.008 | 4  | 2   | 0 | 0 | 59  | 39  | 67 | 158 | 148 | 153 | 65  | 7827  | X IX             | 1448     | 33   | 11237 | L2.6 |
| NG104 | XJ    | 0.03  | 8  | 2   | 0 | 0 | 59  | 39  | 67 | 158 | 148 | 153 | 65  | 7827  | X IX             | 1448     | 4    | 4846  | L2.6 |
| NG105 | XJ    | 0.016 | 4  | 2   | 0 | 0 | 59  | 39  | 67 | 158 | 148 | 153 | 65  | 7827  | X IX             | 1448     | 1955 | 11272 | L2.6 |
| NG106 | XJ    | 0.008 | 4  | 4   | 0 | 0 | 59  | 39  | 67 | 158 | 148 | 153 | 65  | 7827  | X IX             | 1448     | 33   | 11237 | L2.6 |
| NG107 | XJ    | 0.06  | 8  | 8   | 0 | 0 | 59  | 39  | 67 | 158 | 148 | 153 | 65  | 7827  | X III            | 6565     | 4    | 11273 | L2.4 |
| NG108 | XJ    | 0.016 | 4  | 4   | 0 | 1 | 59  | 112 | 67 | 157 | 148 | 153 | 65  | 11191 | X III            | 6566     | 483  | 11274 | L2.7 |
| NG109 | XJ    | 0.125 | 8  | 8   | 0 | 0 | 59  | 39  | 67 | 158 | 148 | 153 | 65  | 7827  | X III            | 6561     | 4    | 11265 | L2.4 |
| NG110 | XJ    | 0.008 | 4  | 2   | 0 | 1 | 59  | 112 | 67 | 157 | 148 | 153 | 65  | 11191 | X III            | 90%-1019 | 483  | 1927  | L2.7 |
| NG111 | XJ    | 0.03  | 8  | 8   | 0 | 1 | 59  | 39  | 67 | 158 | 148 | 153 | 65  | 7827  | X III            | 83%-477  | 4    | 2083  | L2.4 |
| NG112 | XJ    | 0.016 | 4  | 8   | 0 | 1 | 126 | 39  | 67 | 78  | 149 | 71  | 65  | 1927  | X XI             | 206      | 156  | 421   | L2.5 |
| NG113 | XJ    | 0.03  | 8  | 2   | 0 | 0 | 59  | 39  | 67 | 158 | 148 | 153 | 65  | 7827  | X IX             | 3534     | 4    | 5916  | L2.6 |
| NG114 | XJ    | 0.016 | 4  | 4   | 0 | 1 | 109 | 39  | 67 | 111 | 148 | 153 | 133 | 7367  | II               | 251      | 1036 | 11246 | L2.1 |
| NG115 | XJ    | 0.125 | 8  | 8   | 1 | 1 | 109 | 39  | 67 | 157 | 148 | 153 | 133 | 12975 | VII              | 1135     | 1093 | 5161  | L2.9 |
| NG116 | XJ    | 0.03  | 8  | 8   | 0 | 0 | 59  | 39  | 67 | 158 | 148 | 153 | 65  | 7827  | X III            | 6562     | 4    | 11266 | L2.4 |
| NG117 | XJ    | 0.008 | 4  | 4   | 1 | 0 | 59  | 39  | 67 | 78  | 149 | 71  | 65  | 1890  | X XI             | 609      | 137  | 11267 | L2.5 |
| NG118 | XJ    | 0.03  | 4  | 16  | 0 | 0 | 59  | 39  | 67 | 158 | 148 | 71  | 65  | 1588  | X IX             | 3318     | 4    | 11268 | L2.6 |
| NG119 | XJ    | 0.03  | 8  | 4   | 0 | 0 | 59  | 39  | 67 | 158 | 148 | 153 | 65  | 7827  | X IX             | 1448     | 137  | 11269 | L2.6 |
| NG120 | LN    | 0.06  | 64 | 16  | 0 | 0 | 59  | 39  | 67 | 158 | 149 | 153 | 65  | 8118  | X III            | 866      | 186  | 10352 | L2.4 |
| NG121 | LN    | 0.06  | 64 | 16  | 1 | 0 | 109 | 39  | 67 | 158 | 149 | 153 | 65  | 12976 | X VIII           | 2035     | 526  | 3356  | L2.1 |
| NG122 | LN    | 0.125 | 64 | 16  | 0 | 0 | 126 | 39  | 67 | 111 | 148 | 153 | 133 | 1580  | X XI             | 6571     | 156  | 11280 | L2.1 |
| NG123 | LN    | 0.03  | 64 | 8   | 0 | 0 | 109 | 39  | 67 | 111 | 148 | 153 | 133 | 7367  | IX               | 5924     | 4    | 10091 | L2.1 |
| NG124 | LN    | 0.06  | 32 | 16  | 1 | 1 | 126 | 39  | 67 | 111 | 146 | 153 | 65  | 9902  | V                | 809      | 186  | 2051  | L2.1 |
| NG125 | LN    | 0.03  | 32 | 8   | 0 | 1 | 109 | 39  | 67 | 111 | 148 | 153 | 133 | 7367  | IX               | 2978     | 1336 | 11181 | L2.1 |
| NG126 | LN    | 0.015 | 64 | 16  | 0 | 1 | 126 | 39  | 67 | 78  | 148 | 153 | 65  | 1600  | X III            | 1132     | 752  | 11284 | L2.2 |
| NG127 | LN    | 0.06  | 64 | 16  | 0 | 0 | 59  | 39  | 67 | 158 | 148 | 153 | 65  | 7827  | X III            | 1132     | 4    | 2083  | L2.4 |
| NG128 | LN    | 0.03  | 64 | 16  | 0 | 1 | 109 | 39  | 67 | 111 | 148 | 153 | 133 | 7367  | IX               | 2978     | 1336 | 11181 | L2.1 |
| NG129 | LN    | 0.06  | 64 | 8   | 1 | 1 | 126 | 39  | 67 | 158 | 148 | 153 | 65  | 1904  | II               | 2869     | 1958 | 11286 | L2.3 |
| NG130 | LN    | 0.06  | 64 | 16  | 0 | 0 | 59  | 39  | 67 | 78  | 147 | 154 | 65  | 11231 | X III            | 609      | 33   | 4745  | L2.2 |
| NG131 | LN    | 0.03  | 64 | 8   | 1 | 1 | 126 | 39  | 67 | 111 | 148 | 153 | 65  | 7365  | II               | 1115     | 1960 | NA    | L2.3 |
| NG132 | LN    | 0.008 | 64 | 16  | 0 | 0 | 59  | 39  | 67 | 158 | 148 | 153 | 65  | 7827  | X IX             | 1448     | 33   | 11237 | L2.6 |
| NG133 | LN    | 0.125 | 32 | 16  | 1 | 0 | 59  | 39  | 67 | 158 | 149 | 153 | 65  | 8118  | X III            | 866      | 186  | 10352 | L2.4 |
| NG134 | LN    | 0.06  | 64 | 8   | 1 | 1 | 126 | 39  | 67 | 78  | 148 | 153 | 65  | 1600  | XI               | 365      | 33   | NA    | L2.2 |
| NG135 | LN    | 0.06  | 64 | 4   | 0 | 0 | 109 | 39  | 67 | 158 | 148 | 153 | 65  | 9304  | X VIII           | 2035     | 526  | 3356  | L2.1 |
| NG136 | LN    | 0.06  | 32 | 16  | 1 | 1 | 126 | 39  | 67 | 158 | 148 | 153 | 133 | 7828  | IX               | 1053     | 33   | 1614  | L2.6 |
| NG137 | LN    | 0.06  | 64 | 16  | 0 | 0 | 126 | 39  | 67 | 78  | 148 | 153 | 65  | 1600  | IX               | 6578     | 119  | 11290 | L2.6 |
| NG138 | LN    | 0.06  | 64 | 4   | 0 | 1 | 126 | 39  | 67 | 111 | 148 | 153 | 133 | 1580  | X XI             | 1140     | 156  | NA    | L2.1 |
| NG139 | LN    | 0.125 | 64 | 16  | 1 | 0 | 59  | 39  | 67 | 78  | 147 | 154 | 65  | 11231 | X VIII           | 543      | 4    | 1790  | L2.2 |
| NG140 | LN    | 0.015 | 64 | 8   | 0 | 1 | 109 | 39  | 67 | 78  | 148 | 153 | 65  | 7356  | XII/ X X X VI    | 6660     | 1962 | NA    | L2.6 |
| NG141 | LN    | 0.03  | 16 | 16  | 0 | 0 | 126 | 39  | 67 | 78  | 148 | 153 | 65  | 1600  | IX               | 6578     | 119  | 11290 | L2.6 |
| NG142 | LN    | 0.03  | 64 | 16  | 0 | 0 | 59  | 39  | 67 | 78  | 148 | 153 | 65  | 7363  | XII/ X X X VI    | 2978     | 1336 | 11181 | L2.6 |
| NG143 | LN    | 0.06  | 32 | 2   | 0 | 1 | 59  | 39  | 67 | 111 | 148 | 153 | 65  | 1583  | X VIII           | 580      | 328  | 5699  | L2.1 |
| NG144 | LN    | 0.03  | 64 | 16  | 0 | 0 | 126 | 39  | 67 | 111 | 148 | 153 | 65  | 7365  | 86.001 (partial) | 6066     | 137  | 11294 | L2.1 |
| NG145 | LN    | 0.06  | 64 | 16  | 1 | 0 | 126 | 39  | 67 | 111 | 148 | 153 | 65  | 7365  | II               | 5990     | 1960 | 11295 | L2.3 |
| NG146 | GD_SZ | 0.125 | 16 | 16  | 1 | 1 | 59  | 39  | 67 | 111 | 148 | 153 | 65  | 1583  | X VIII           | 5873     | 1780 | 9960  | L2.1 |
| NG147 | GD_SZ | 0.125 | 16 | 16  | 0 | 0 | 126 | 39  | 67 | 78  | 148 | 153 | 65  | 1600  | X III            | 2261     | 186  | 3741  | L2.6 |
| NG148 | GD_SZ | 0.125 | 16 | ≥32 | 1 | 1 | 59  | 39  | 67 | 78  | 148 | 153 | 65  | 7363  | XII/ X X X VI    | 2978     | 1058 | 5061  | L2.6 |
| NG149 | GD_SZ | 0.125 | 32 | 4   | 1 | 0 | 109 | 39  | 67 | 111 | 149 | 154 | 65  | 12977 | 88.001(partial)  | 1053     | 1018 | 13421 | L2.5 |

|       |       |        |    |       |   |   |     |    |    |     |     |     |     |       |                  |      |      |       |      |
|-------|-------|--------|----|-------|---|---|-----|----|----|-----|-----|-----|-----|-------|------------------|------|------|-------|------|
| NG150 | GD_SZ | 0.125  | 32 | ≥32   | 0 | 1 | 126 | 39 | 67 | 111 | 148 | 153 | 65  | 7365  | X III            | 1449 | 33   | 13582 | L2.3 |
| NG151 | GD_SZ | 0.008  | 32 | 16    | 0 | 0 | 126 | 39 | 67 | 158 | 148 | 153 | 65  | 1904  | X III            | 1132 | 428  | 13677 | L2.4 |
| NG152 | GD_SZ | 0.008  | 16 | 16    | 0 | 0 | 126 | 39 | 67 | 78  | 148 | 153 | 65  | 1600  | X III            | 1132 | 33   | 1766  | L2.2 |
| NG153 | GD_SZ | 0.008  | 16 | 16    | 1 | 0 | 126 | 39 | 67 | 111 | 148 | 153 | 65  | 7365  | X III            | 3971 | 21   | 13681 | L2.5 |
| NG154 | GD_SZ | 0.004  | 16 | 8     | 1 | 1 | 126 | 39 | 67 | 111 | 148 | 153 | 65  | 7365  | X III            | 581  | 33   | 1866  | L2.3 |
| NG155 | GD_SZ | 0.008  | 32 | 8     | 0 | 0 | 126 | 39 | 67 | 111 | 148 | 153 | 133 | 1580  | X XI             | 4686 | 156  | 7794  | L2.1 |
| NG156 | GD_SZ | 0.004  | 64 | 4     | 1 | 1 | 109 | 39 | 67 | 158 | 148 | 153 | 65  | 9304  | X III            | 7866 | 4    | 13629 | L2.4 |
| NG157 | GD_SZ | 0.004  | 16 | 4     | 1 | 1 | 59  | 39 | 67 | 78  | 147 | 154 | 65  | 11231 | X III            | 130  | 33   | 1743  | L2.2 |
| NG158 | GD_SZ | 0.008  | 32 | 16    | 0 | 1 | 126 | 39 | 67 | 158 | 148 | 153 | 65  | 1904  | X III            | 1132 | 428  | 13677 | L2.4 |
| NG159 | GD_SZ | ≤0.002 | 32 | 4     | 1 | 1 | 59  | 39 | 67 | 111 | 148 | 71  | 65  | 1921  | X VIII           | 147  | 328  | 13661 | L2.6 |
| NG160 | GD_SZ | 0.004  | 64 | 8     | 0 | 1 | 59  | 39 | 67 | 111 | 148 | 153 | 65  | 1583  | X III            | 6544 | 4    | 11224 |      |
| NG161 | GD_SZ | 0.125  | 32 | >16   | 0 | 0 | 59  | 39 | 67 | 111 | 148 | 153 | 65  | 1583  | X VIII           | 5873 | 1780 | 9960  | L2.1 |
| NG162 | GD_SZ | 0.032  | 32 | >16   | 0 | 0 | 59  | 39 | 67 | 78  | 148 | 153 | 65  | 7363  | X/X X X V        | 3215 | 10   | 5308  | L2.8 |
| NG163 | GD_SZ | 0.25   | 64 | 16    | 0 | 0 | 126 | 39 | 67 | 78  | 148 | 153 | 65  | 1600  | X III            | 7879 | 33   | 13663 | L2.2 |
| NG165 | JS    | 0.015  | 8  | 8     | 1 | 0 | 126 | 39 | 67 | 158 | 148 | 153 | 65  | 1904  | XII/X X X VI     | 5166 | 33   | 8724  | L2.3 |
| NG166 | JS    | 0.015  | 16 | 16    | 0 | 0 | 126 | 39 | 67 | 158 | 148 | 153 | 133 | 7828  | IX               | 1053 | 33   | 1614  | L2.6 |
| NG167 | JS    | 0.015  | 16 | 16    | 0 | 0 | 59  | 39 | 67 | 78  | 148 | 153 | 65  | 7363  | XII/X X X VI     | 2978 | 1058 | 5061  | L2.6 |
| NG168 | JS    | 0.03   | 16 | 4     | 0 | 1 | 109 | 39 | 67 | 78  | 148 | 153 | 65  | 7356  | X VIII           | 90   | 33   | 568   | L2.1 |
| NG169 | HN    | 0.125  | 16 | 8     | 0 | 0 | 126 | 39 | 67 | 111 | 148 | 153 | 65  | 7365  | 86.001 (partial) | 581  | 33   | 1866  | L2.3 |
| NG170 | HN    | 0.03   | 16 | 8     | 1 | 0 | 126 | 39 | 67 | 111 | 148 | 153 | 65  | 7365  | X XI             | 3531 | 186  | 5913  | L2.3 |
| NG171 | HN    | 0.125  | 16 | 1     | 0 | 0 | 109 | 39 | 67 | 78  | 148 | 153 | 65  | 7356  | X III            | 90   | 156  | 1742  | L2.6 |
| NG172 | HN    | 0.03   | 16 | 32    | 0 | 1 | 59  | 39 | 67 | 158 | 148 | 153 | 65  | 7827  | X III            | 4639 | 4    | 11170 | L2.4 |
| NG173 | HN    | 0.125  | 16 | 4     | 0 | 0 | 59  | 39 | 67 | 158 | 148 | 153 | 65  | 7827  | X III            | 6515 | 1943 | 11172 | L2.4 |
| NG174 | HN    | 0.03   | 16 | 8     | 1 | 1 | 126 | 39 | 67 | 111 | 148 | 153 | 65  | 7365  | X XII            | 6516 | 186  | 11173 | L2.3 |
| NG175 | HN    | 0.125  | 16 | 8     | 0 | 0 | 59  | 39 | 67 | 158 | 148 | 153 | 65  | 7827  | X III            | 6517 | 4    | 11174 | L2.4 |
| NG176 | HN    | 0.03   | 16 | 8     | 0 | 0 | 126 | 39 | 67 | 111 | 149 | 71  | 65  | 6714  | X XI             | 206  | 156  | 421   | L2.5 |
| NG177 | HN    | 0.125  | 16 | 8     | 0 | 0 | 59  | 39 | 67 | 158 | 148 | 153 | 65  | 7827  | X III            | 1053 | 287  | 11175 | L2.4 |
| NG178 | HN    | 0.125  | 16 | 4     | 0 | 0 | 126 | 39 | 67 | 158 | 148 | 153 | 65  | 1904  | X III            | 158  | 443  | 3340  | L2.4 |
| NG179 | HN    | 0.032  | 16 | 16    | 0 | 0 | 59  | 39 | 67 | 78  | 148 | 153 | 65  | 7363  | X/X X X V        | 3215 | 10   | 5308  | L2.8 |
| NG180 | HN    | 0.25   | 16 | 2     | 0 | 0 | 59  | 39 | 67 | 158 | 148 | 153 | 65  | 7827  | X III            | 5692 | 4    | 9652  | L2.6 |
| NG181 | HN    | 0.125  | 16 | 8     | 0 | 1 | 59  | 39 | 67 | 158 | 148 | 153 | 65  | 7827  | X III            | 1053 | 4    | 2318  | L2.4 |
| NG182 | HN    | 0.125  | 16 | 4     | 0 | 0 | 59  | 39 | 67 | 158 | 148 | 153 | 65  | 7827  | X III            | 1053 | 4    | 2318  | L2.4 |
| NG183 | HN    | 0.125  | 16 | 8     | 0 | 0 | 109 | 39 | 67 | 111 | 148 | 153 | 133 | 7367  | II               | 3723 | 1036 | 6312  | L2.1 |
| NG184 | HN    | 0.125  | 16 | 2     | 0 | 1 | 59  | 39 | 67 | 158 | 148 | 153 | 65  | 7827  | X III            | 3534 | 4    | 5916  | L2.6 |
| NG185 | HN    | 0.03   | 16 | 0.25  | 1 | 0 | 126 | 39 | 67 | 111 | 148 | 154 | 65  | 9899  | X XI             | 246  | 1817 | 11183 | L2.6 |
| NG186 | HN    | 0.125  | 16 | 16    | 0 | 0 | 126 | 39 | 67 | 111 | 148 | 153 | 133 | 1580  | X XI             | 6521 | 156  | 11184 | L2.1 |
| NG187 | HN    | 0.016  | 8  | 2     | 1 | 1 | 126 | 39 | 67 | 111 | 148 | 153 | 65  | 7365  | X XI             | 6522 | 33   | 11185 | L2.3 |
| NG188 | HN    | 0.016  | 8  | 2     | 1 | 1 | 109 | 39 | 67 | 111 | 148 | 153 | 133 | 7367  | II               | 1123 | 1036 | 11187 | L2.1 |
| NG189 | HN    | 0.03   | 8  | 0.125 | 1 | 0 | 126 | 39 | 67 | 78  | 148 | 153 | 65  | 1600  | II               | 1042 | 737  | 3282  | L2.2 |
| NG190 | HN    | 0.03   | 16 | 8     | 1 | 0 | 126 | 39 | 67 | 111 | 148 | 153 | 65  | 7365  | X XI             | 3531 | 473  | 11189 | L2.3 |
| NG191 | HN    | 0.06   | 16 | 16    | 0 | 0 | 126 | 39 | 67 | 111 | 148 | 153 | 133 | 1580  | X XI             | 1508 | 156  | 11180 | L2.1 |
| NG192 | HN    | 0.125  | 16 | 2     | 1 | 0 | 126 | 39 | 67 | 111 | 148 | 153 | 65  | 7365  | X XI             | 6526 | 186  | 11192 | L2.3 |
| NG193 | HN    | 0.015  | 8  | 8     | 0 | 0 | 59  | 39 | 67 | 78  | 148 | 153 | 65  | 7363  | NA               | 6527 | 1946 | 11193 | L2.3 |
| NG194 | HN    | 0.125  | 16 | 8     | 0 | 0 | 109 | 39 | 67 | 158 | 148 | 153 | 65  | 9304  | X VIII           | 6528 | 477  | 11194 | L2.1 |
| NG195 | HN    | 0.125  | 16 | 2     | 0 | 1 | 59  | 39 | 67 | 158 | 148 | 153 | 65  | 7827  | X III            | 1053 | 4    | 2318  | L2.4 |
| NG196 | HN    | 0.25   | 16 | 16    | 0 | 1 | 59  | 39 | 67 | 158 | 148 | 153 | 65  | 7827  | X III            | 1053 | 4    | 2318  | L2.4 |
| NG197 | HN    | 0.125  | 16 | 8     | 0 | 0 | 126 | 39 | 67 | 158 | 148 | 153 | 65  | 1904  | X III            | 6538 | 4    | 11216 | L2.4 |
| NG198 | SC    | 0.125  | 16 | 16    | 0 | 1 | 59  | 39 | 67 | 78  | 147 | 154 | 65  | 11231 | X VIII           | 543  | 107  | 4676  | L2.2 |
| NG199 | SC    | 0.125  | 8  | 16    | 0 | 1 | 59  | 39 | 67 | 78  | 147 | 154 | 65  | 11231 | X VIII           | 6059 | 4    | 11248 | L2.2 |
| NG200 | SC    | 0.125  | 8  | 16    | 0 | 1 | 126 | 39 | 67 | 111 | 148 | 153 | 65  | 7365  | X III            | 184  | 21   | 11255 | L2.5 |

|       |    |        |    |       |   |   |     |     |    |     |     |     |     |       |                 |      |      |       |      |
|-------|----|--------|----|-------|---|---|-----|-----|----|-----|-----|-----|-----|-------|-----------------|------|------|-------|------|
| NG201 | SC | 0.25   | 64 | 16    | 0 | 1 | 59  | 39  | 67 | 78  | 148 | 153 | 65  | 7363  | X/X X X V       | 917  | 10   | 1424  | L2.8 |
| NG202 | SC | 0.008  | 16 | 8     | 1 | 0 | 109 | 39  | 67 | 111 | 148 | 153 | 133 | 7367  | II              | 6549 | 4    | 11234 | L2.1 |
| NG203 | SC | 0.008  | 16 | 16    | 0 | 1 | 109 | 39  | 67 | 111 | 148 | 153 | 133 | 7367  | II              | 1135 | 1093 | 5161  | L2.9 |
| NG204 | SC | 0.008  | 16 | 16    | 1 | 1 | 109 | 39  | 67 | 111 | 148 | 153 | 133 | 7367  | II              | 1135 | 1093 | 5161  | L2.9 |
| NG205 | SC | 0.015  | 16 | 16    | 1 | 0 | 109 | 39  | 67 | 111 | 148 | 153 | 133 | 7367  | II              | 3029 | 1036 | 5062  | L2.1 |
| NG206 | SC | 0.015  | 32 | 4     | 0 | 1 | 59  | 112 | 67 | 157 | 148 | 153 | 65  | 11191 | X III           | 251  | 156  | 10354 | L2.7 |
| NG207 | SC | 0.015  | 16 | 8     | 1 | 1 | 59  | 39  | 67 | 158 | 148 | 71  | 65  | 1588  | X IX            | 217  | 33   | 2366  | L2.6 |
| NG208 | SC | 0.015  | 8  | 8     | 1 | 1 | 126 | 39  | 67 | 111 | 148 | 153 | 65  | 7365  | X III           | 6554 | 21   | 11251 | L2.5 |
| NG209 | SC | 0.015  | 16 | 4     | 1 | 0 | 59  | 112 | 67 | 157 | 148 | 153 | 65  | 11191 | X III           | 251  | 1921 | 11227 | L2.7 |
| NG210 | SC | 0.015  | 16 | 16    | 1 | 1 | 109 | 39  | 67 | 111 | 148 | 153 | 133 | 7367  | II              | 1135 | 446  | 1768  | L2.9 |
| NG211 | SC | 0.015  | 32 | 0.125 | 0 | 1 | 126 | 39  | 67 | 157 | 148 | 153 | 65  | 1903  | II              | 90   | 18   | 621   | L2.9 |
| NG212 | SC | 0.03   | 16 | 16    | 1 | 1 | 109 | 39  | 67 | 111 | 148 | 153 | 65  | 1579  | II              | 3029 | 1036 | 5062  | L2.1 |
| NG213 | SC | 0.03   | 16 | 16    | 1 | 0 | 109 | 39  | 67 | 111 | 148 | 153 | 133 | 7367  | II              | 3029 | 4    | 4991  | L2.1 |
| NG214 | SC | 0.03   | 8  | 16    | 0 | 0 | 109 | 39  | 67 | 111 | 148 | 153 | 133 | 7367  | II              | 6232 | 1036 | 10650 | L2.1 |
| NG215 | SC | 0.25   | 16 | ≥16   | 1 | 0 | 126 | 39  | 67 | 111 | 148 | 153 | 65  | 7365  | X III           | 6545 | 4    | 11226 | L2.5 |
| NG216 | SC | 0.25   | 16 | ≥16   | 0 | 1 | 59  | 39  | 67 | 111 | 148 | 153 | 133 | 1963  | V               | 731  | 75   | 11236 | L2.1 |
| NG217 | SC | 0.25   | 32 | ≥16   | 1 | 1 | 435 | 39  | 67 | 111 | 148 | 153 | 65  | 12515 | X III           | 2022 | 186  | 11241 | L2.3 |
| NG218 | SC | 0.25   | 32 | ≥16   | 1 | 1 | 109 | 39  | 67 | 111 | 147 | 153 | 65  | 6960  | X XI            | 130  | 1951 | 11243 | L2.6 |
| NG219 | SC | 0.25   | 32 | ≥16   | 1 | 0 | 59  | 39  | 67 | 78  | 148 | 154 | 65  | 1597  | X VIII          | 1132 | 4    | 2083  | L2.2 |
| NG220 | SC | 0.25   | 32 | ≥16   | 1 | 1 | 126 | 39  | 67 | 111 | 148 | 153 | 65  | 7365  | II              | 581  | 137  | 8784  | L2.3 |
| NG221 | SC | 0.25   | 16 | ≥16   | 1 | 0 | 59  | 39  | 67 | 78  | 147 | 153 | 65  | 11648 | X VIII          | 543  | 1952 | 11245 | L2.2 |
| NG222 | SC | 0.25   | 32 | ≥16   | 1 | 1 | 126 | 39  | 67 | 111 | 148 | 153 | 65  | 7365  | X III           | 1053 | 21   | 3435  | L2.5 |
| NG223 | ZJ | 0.016  | 16 | 8     | 0 | 0 | 59  | 39  | 67 | 158 | 148 | 153 | 65  | 7827  | X III           | 1132 | 526  | 10403 | L2.4 |
| NG224 | ZJ | 0.032  | 16 | 8     | 0 | 0 | 59  | 39  | 67 | 158 | 148 | 153 | 65  | 7827  | X III           | 3971 | 470  | 10404 | L2.4 |
| NG225 | ZJ | 0.032  | 16 | 2     | 0 | 0 | 109 | 39  | 67 | 158 | 148 | 668 | 65  | 12969 | X VIII          | 90   | 1312 | 10348 | L2.1 |
| NG226 | ZJ | 0.032  | 16 | 8     | 1 | 0 | 59  | 39  | 67 | 78  | 148 | 153 | 65  | 7363  | XII/X X X VI    | 1135 | 446  | 1768  | L2.6 |
| NG227 | ZJ | 0.008  | 16 | 4     | 0 | 1 | 126 | 39  | 67 | 78  | 149 | 71  | 65  | 1927  | X XI            | 1448 | 1036 | 10400 | L2.5 |
| NG228 | ZJ | 0.032  | 16 | 8     | 1 | 0 | 109 | 39  | 67 | 158 | 148 | 668 | 65  | 12969 | X VIII          | 1879 | 33   | 3102  | L2.1 |
| NG229 | ZJ | 0.016  | 16 | 8     | 1 | 1 | 126 | 39  | 67 | 111 | 148 | 153 | 65  | 7365  | X III           | 6058 | 1841 | 10312 | L2.5 |
| NG230 | ZJ | 0.016  | 16 | 8     | 1 | 1 | 126 | 39  | 67 | 78  | 148 | 153 | 65  | 1600  | X III           | 1132 | 1843 | 10326 | L2.2 |
| NG231 | ZJ | 0.016  | 32 | 8     | 1 | 0 | 126 | 39  | 67 | 78  | 148 | 153 | 65  | 1600  | X III           | 315  | 33   | 566   | L2.2 |
| NG232 | ZJ | 0.0625 | 16 | 8     | 0 | 1 | 59  | 39  | 67 | 78  | 149 | 153 | 65  | 10634 | X III           | 1053 | 1583 | 8720  | L2.5 |
| NG233 | ZJ | 0.0625 | 32 | 8     | 0 | 0 | 126 | 39  | 67 | 111 | 148 | 153 | 65  | 7365  | X XI            | 4    | 4    | 225   | L2.1 |
| NG234 | ZJ | 0.0625 | 16 | 8     | 0 | 1 | 59  | 39  | 67 | 158 | 148 | 153 | 65  | 7827  | X III           | 3760 | 33   | 10401 | L2.6 |
| NG235 | ZJ | 0.0625 | 16 | 8     | 0 | 0 | 109 | 39  | 67 | 111 | 148 | 153 | 133 | 7367  | X III           | 6062 | 1058 | 10316 | L2.9 |
| NG236 | ZJ | 0.0625 | 16 | 4     | 0 | 1 | 126 | 39  | 67 | 78  | 148 | 153 | 65  | 1600  | X III           | 6567 | 156  | 11275 | L2.2 |
| NG237 | ZJ | 0.0625 | 16 | 8     | 0 | 0 | 126 | 39  | 67 | 111 | 146 | 153 | 65  | 9902  | 5.002 (partial) | 6066 | 107  | 10320 | L2.1 |
| NG238 | ZJ | 0.0625 | 16 | 8     | 0 | 1 | 109 | 39  | 67 | 158 | 148 | 153 | 65  | 9304  | X VIII          | 1053 | 4    | 2318  | L2.1 |
| NG239 | ZJ | 0.0625 | 16 | 8     | 1 | 1 | 59  | 39  | 67 | 78  | 148 | 153 | 65  | 7363  | 44.001          | 206  | 33   | 270   | L2.6 |
| NG240 | ZJ | 0.0625 | 16 | 8     | 1 | 1 | 59  | 39  | 67 | 157 | 189 | 153 | 65  | 8112  | X IV            | 206  | 33   | 270   | L2.7 |
| NG241 | ZJ | 0.0625 | 16 | 8     | 1 | 1 | 126 | 485 | 67 | 111 | 148 | 153 | 65  | 12978 | X III           | 543  | 156  | 1996  | L2.5 |
| NG242 | ZJ | 0.0625 | 16 | 4     | 1 | 0 | 126 | 39  | 67 | 78  | 148 | 153 | 65  | 1600  | X III           | 3578 | 107  | 10405 | L2.6 |
| NG243 | ZJ | 0.0625 | 16 | 8     | 1 | 1 | 109 | 39  | 67 | 111 | 148 | 153 | 133 | 7367  | II              | 1448 | 446  | 10349 | L2.1 |
| NG244 | ZJ | 0.0625 | 16 | 8     | 1 | 0 | 126 | 39  | 67 | 111 | 148 | 153 | 65  | 7365  | X XI            | 1135 | 446  | 1768  | L2.3 |
| NG245 | ZJ | 0.0625 | 16 | 8     | 1 | 1 | 435 | 39  | 67 | 111 | 148 | 153 | 65  | 12515 | X III           | 206  | 33   | 270   | L2.3 |
| NG246 | ZJ | 0.0625 | 16 | 8     | 0 | 1 | 126 | 39  | 67 | 78  | 148 | 153 | 65  | 1600  | X III           | 6075 | 75   | 10331 | L2.2 |
| NG247 | ZJ | 0.0625 | 16 | 8     | 0 | 0 | 126 | 39  | 67 | 111 | 148 | 153 | 133 | 1580  | X XI            | 2035 | 526  | 3356  | L2.1 |
| NG248 | SH | 0.016  | 16 | 8     | 0 | 0 | 109 | 39  | 67 | 111 | 148 | 153 | 65  | 1579  | 44.001          | 1489 | 563  | 2400  | L2.1 |
| NG249 | SH | 0.004  | 4  | 4     | 1 | 1 | 126 | 39  | 67 | 78  | 148 | 153 | 65  | 1600  | X III           | 6029 | 60   | 10276 | L2.2 |
| NG250 | SH | 0.03   | 2  | 8     | 0 | 0 | 109 | 39  | 67 | 111 | 148 | 153 | 65  | 1579  | X III           | 708  | 21   | 8812  | L2.6 |

|       |    |        |    |       |   |   |     |    |    |     |     |     |     |       |                  |      |      |       |      |
|-------|----|--------|----|-------|---|---|-----|----|----|-----|-----|-----|-----|-------|------------------|------|------|-------|------|
| NG251 | SH | 0.016  | 8  | 32    | 0 | 0 | 126 | 39 | 67 | 111 | 148 | 153 | 65  | 7365  | X VIII           | 6030 | 137  | 10277 | L2.3 |
| NG252 | SH | 0.004  | 8  | 4     | 0 | 0 | 126 | 39 | 67 | 158 | 148 | 153 | 65  | 1904  | X III            | 1284 | 1036 | 10387 | L2.3 |
| NG253 | SH | 0.016  | 16 | 8     | 1 | 1 | 126 | 39 | 67 | 111 | 148 | 153 | 65  | 7365  | X XI             | 3531 | 1826 | 10268 | L2.3 |
| NG254 | SH | 0.03   | 16 | 1     | 1 | 0 | 59  | 39 | 67 | 158 | 148 | 153 | 65  | 7827  | X III            | 6031 | 186  | 10278 | L2.4 |
| NG255 | SH | 0.016  | 8  | 1     | 1 | 0 | 59  | 39 | 67 | 158 | 148 | 153 | 65  | 7827  | X III            | 6032 | 4    | 10279 | L2.4 |
| NG256 | SH | 0.004  | 2  | 8     | 0 | 1 | 109 | 39 | 67 | 158 | 148 | 153 | 65  | 9304  | X VIII           | 2328 | 156  | 10388 | L2.1 |
| NG258 | SH | 0.03   | 8  | 8     | 1 | 0 | 126 | 39 | 67 | 111 | 146 | 154 | 65  | 12979 | II               | 1132 | 857  | 5304  | L2.6 |
| NG259 | SH | 0.03   | 4  | 8     | 1 | 0 | 126 | 39 | 67 | 78  | 148 | 153 | 65  | 1600  | X III            | 1053 | 4    | 2318  | L2.6 |
| NG260 | SH | 0.016  | 16 | 2     | 1 | 1 | 126 | 39 | 67 | 78  | 148 | 153 | 65  | 1600  | X III            | 1448 | 1832 | 10280 | L2.6 |
| NG261 | SH | 0.016  | 8  | 8     | 0 | 1 | 126 | 39 | 67 | 78  | 148 | 153 | 65  | 1600  | 44.001           | 1879 | 33   | 3102  | L2.6 |
| NG262 | SH | 0.016  | 16 | 8     | 1 | 1 | 126 | 39 | 67 | 78  | 149 | 71  | 65  | 1927  | II               | 905  | 186  | 10389 | L2.5 |
| NG263 | SH | 0.016  | 16 | 8     | 0 | 0 | 126 | 39 | 67 | 111 | 148 | 153 | 133 | 1580  | X XI             | 1132 | 4    | 2083  | L2.1 |
| NG264 | SH | 0.008  | 8  | 8     | 0 | 0 | 59  | 39 | 67 | 78  | 147 | 154 | 65  | 11231 | X VIII           | 6033 | 137  | 10281 | L2.2 |
| NG265 | SH | 0.008  | 4  | 1     | 0 | 1 | 109 | 39 | 67 | 78  | 148 | 153 | 65  | 7356  | X III            | 2035 | 526  | 3356  | L2.6 |
| NG266 | GX | 0.03   | 16 | 4     | 1 | 1 | 126 | 39 | 67 | 111 | 148 | 153 | 65  | 7365  | X XI             | 1135 | 1822 | 10248 | L2.3 |
| NG267 | GX | 0.008  | 16 | 0.125 | 1 | 0 | 126 | 39 | 67 | 111 | 148 | 154 | 65  | 9899  | X XI             | 182  | 21   | 247   | L2.6 |
| NG268 | GX | 0.03   | 8  | 16    | 0 | 0 | 59  | 39 | 67 | 78  | 148 | 153 | 65  | 7363  | X VIII           | 6021 | 137  | 10260 |      |
| NG269 | GX | 0.06   | 32 | 8     | 1 | 0 | 109 | 39 | 67 | 158 | 148 | 153 | 65  | 9304  | X VIII           | 2261 | 1823 | 10262 | L2.1 |
| NG270 | GX | 0.06   | 32 | 16    | 0 | 0 | 126 | 39 | 67 | 78  | 149 | 153 | 65  | 1590  | VII              | 6024 | 563  | 10265 | L2.5 |
| NG271 | GX | 0.06   | 32 | 4     | 1 | 0 | 126 | 39 | 67 | 111 | 148 | 153 | 65  | 7365  | X III            | 5924 | 156  | 10342 | L2.5 |
| NG272 | GX | 0.06   | 32 | 16    | 0 | 0 | 126 | 39 | 67 | 111 | 148 | 153 | 65  | 7365  | X III            | 6025 | 156  | 10267 | L2.5 |
| NG273 | GX | 0.008  | 8  | 16    | 0 | 1 | 109 | 39 | 67 | 111 | 148 | 153 | 133 | 7367  | X III            | 206  | 865  | 4823  | L2.1 |
| NG274 | GX | 0.03   | 8  | 4     | 0 | 0 | 109 | 39 | 67 | 111 | 148 | 153 | 133 | 7367  | X III            | 206  | 156  | 421   | L2.9 |
| NG275 | GX | 0.008  | 8  | 4     | 1 | 0 | 109 | 39 | 67 | 111 | 147 | 153 | 65  | 6960  | X XI             | 251  | 483  | 1927  | L2.1 |
| NG276 | GX | 0.5    | 32 | 16    | 1 | 1 | 126 | 39 | 67 | 158 | 148 | 153 | 65  | 1904  | II               | 206  | 1817 | 11129 | L2.3 |
| NG277 | GX | 0.008  | 8  | 2     | 0 | 0 | 126 | 39 | 67 | 158 | 148 | 153 | 65  | 1904  | II               | 1132 | 156  | 2271  | L2.3 |
| NG278 | GX | 0.03   | 8  | 8     | 0 | 0 | 109 | 39 | 67 | 111 | 148 | 153 | 133 | 7367  | X III            | 2035 | 215  | 11133 | L2.1 |
| NG279 | GX | 0.03   | 16 | 16    | 0 | 0 | 126 | 39 | 67 | 158 | 148 | 153 | 65  | 1904  | II               | 915  | 21   | 1422  | L2.3 |
| NG280 | TJ | 0.0625 | 16 | 32    | 0 | 0 | 126 | 39 | 67 | 78  | 146 | 153 | 65  | 1601  | V                | 6040 | 75   | 10288 | L2.1 |
| NG281 | TJ | 0.25   | 16 | 32    | 0 | 0 | 59  | 39 | 67 | 78  | 148 | 153 | 65  | 7363  | X/X X X V        | 917  | 10   | 1424  | L2.8 |
| NG282 | TJ | 0.0625 | 8  | 4     | 1 | 1 | 59  | 39 | 67 | 157 | 148 | 153 | 65  | 1599  | X III            | 6041 | 479  | 10289 | L2.3 |
| NG283 | TJ | 0.0625 | 16 | 4     | 1 | 0 | 59  | 39 | 67 | 111 | 148 | 153 | 65  | 1583  | X III            | 1715 | 547  | 10345 | L2.2 |
| NG284 | TJ | 0.0625 | 16 | 8     | 0 | 0 | 59  | 39 | 67 | 78  | 148 | 153 | 65  | 7363  | X III            | 1053 | 4    | 2318  | L2.4 |
| NG285 | TJ | 0.0625 | 8  | 4     | 0 | 0 | 59  | 39 | 67 | 111 | 148 | 153 | 65  | 1583  | X III            | 1715 | 547  | 10345 | L2.2 |
| NG286 | TJ | 0.0625 | 8  | 16    | 0 | 0 | 109 | 39 | 67 | 78  | 148 | 71  | 65  | 1603  | X XI             | 6046 | 1838 | 10299 | L2.5 |
| NG287 | TJ | 0.0625 | 16 | 32    | 0 | 0 | 59  | 39 | 67 | 111 | 148 | 153 | 65  | 1583  | X VIII           | 6049 | 328  | 10302 | L2.1 |
| NG288 | TJ | 0.0625 | 8  | 4     | 1 | 0 | 59  | 39 | 67 | 111 | 148 | 153 | 65  | 1583  | X III            | 1715 | 547  | 10345 | L2.2 |
| NG289 | CQ | 0.06   | 16 | 16    | 0 | 1 | 126 | 39 | 67 | 111 | 148 | 153 | 65  | 7365  | X III            | 6475 | 21   | 11110 | L2.5 |
| NG290 | CQ | 0.06   | 16 | 16    | 0 | 1 | 126 | 39 | 67 | 78  | 148 | 153 | 65  | 1600  | IX               | 6476 | 1932 | 11111 | L2.6 |
| NG291 | CQ | 0.06   | 32 | 16    | 1 | 1 | 126 | 39 | 67 | 111 | 148 | 153 | 65  | 7365  | II               | 6477 | 186  | 11112 | L2.3 |
| NG292 | CQ | 0.06   | 16 | 16    | 0 | 0 | 109 | 39 | 67 | 111 | 148 | 153 | 133 | 7367  | II               | 3029 | 1036 | 5062  | L2.1 |
| NG293 | CQ | 0.06   | 16 | 16    | 1 | 1 | 126 | 39 | 67 | 158 | 148 | 153 | 65  | 1904  | X III            | 6478 | 4    | 11113 | L2.4 |
| NG294 | CQ | 0.06   | 32 | 4     | 0 | 0 | 59  | 39 | 67 | 158 | 148 | 153 | 65  | 7827  | 19.001 (partial) | 1448 | 4    | 4846  | L2.6 |
| NG295 | CQ | 0.06   | 32 | 8     | 0 | 1 | 126 | 39 | 67 | 111 | 148 | 153 | 65  | 7365  | XII/X X X VI     | 1135 | 1933 | 11116 | L2.2 |
| NG296 | GD | 0.25   | 16 | 4     | 1 | 0 | 126 | 39 | 67 | 111 | 149 | 153 | 65  | 1928  | X VIII           | 1226 | 137  | 10339 | L2.3 |
| NG297 | GD | 0.25   | 16 | 4     | 1 | 1 | 126 | 39 | 67 | 78  | 148 | 153 | 65  | 1600  | X III            | 1733 | 156  | 2841  | L2.2 |
| NG298 | GD | 0.25   | 16 | 16    | 1 | 0 | 109 | 39 | 67 | 111 | 148 | 153 | 133 | 7367  | II               | 6015 | 1817 | 10241 | L2.9 |
| NG299 | GD | 0.25   | 8  | 32    | 0 | 1 | 126 | 39 | 67 | 111 | 148 | 153 | 65  | 7365  | X III            | 6016 | 1818 | 10242 | L2.5 |
| NG300 | GD | 0.25   | 16 | 32    | 0 | 0 | 109 | 39 | 67 | 111 | 148 | 153 | 133 | 7367  | II               | 2978 | 1058 | 5061  | L2.9 |
| NG301 | GD | 0.25   | 16 | 32    | 0 | 1 | 126 | 39 | 67 | 111 | 148 | 153 | 65  | 7365  | X III            | 6016 | 1818 | 10242 | L2.5 |

|       |    |        |    |      |   |   |     |     |    |     |     |     |     |       |                  |      |      |       |      |
|-------|----|--------|----|------|---|---|-----|-----|----|-----|-----|-----|-----|-------|------------------|------|------|-------|------|
| NG302 | GD | 0.125  | 16 | 16   | 0 | 0 | 59  | 39  | 67 | 78  | 148 | 153 | 65  | 7363  | X/X X X V        | 5979 | 10   | 10199 | L2.8 |
| NG303 | GD | 0.125  | 8  | 4    | 0 | 1 | 59  | 39  | 67 | 78  | 147 | 154 | 65  | 11231 | X III            | 1448 | 4    | 4846  | L2.2 |
| NG304 | GD | 0.125  | 8  | 32   | 0 | 0 | 59  | 39  | 67 | 111 | 148 | 153 | 65  | 1583  | X VIII           | 5987 | 1780 | 10207 | L2.1 |
| NG305 | GD | 0.125  | 32 | 8    | 0 | 0 | 59  | 39  | 67 | 158 | 148 | 153 | 65  | 7827  | X III            | 4197 | 110  | 9176  | L2.6 |
| NG306 | GD | 0.032  | 4  | 8    | 0 | 0 | 59  | 39  | 67 | 78  | 148 | 153 | 65  | 7363  | X/X X X V        | 6003 | 1815 | 10228 | L2.8 |
| NG307 | GD | 0.002  | 16 | 2    | 0 | 1 | 109 | 39  | 67 | 158 | 148 | 668 | 65  | 12969 | X VIII           | 6006 | 367  | 10231 | L2.1 |
| NG308 | GD | 0.004  | 16 | 16   | 0 | 0 | 435 | 39  | 67 | 78  | 148 | 153 | 65  | 12980 | V                | 90   | 33   | 568   | L2.6 |
| NG309 | GD | 0.004  | 16 | 2    | 0 | 0 | 59  | 39  | 67 | 78  | 149 | 154 | 65  | 11956 | II               | 6011 | 953  | 10237 | L2.6 |
| NG310 | GD | 0.004  | 16 | 4    | 1 | 0 | 59  | 39  | 67 | 78  | 148 | 153 | 65  | 7363  | X III            | 6013 | 566  | 10239 | L2.5 |
| NG311 | GD | 0.004  | 16 | 16   | 0 | 1 | 126 | 39  | 67 | 111 | 146 | 153 | 65  | 9902  | 3.001 (partial)  | 609  | 186  | 1056  | L2.1 |
| NG312 | GD | 0.004  | 16 | 2    | 1 | 0 | 59  | 39  | 67 | 111 | 148 | 153 | 65  | 1583  | II               | 90   | 137  | 1691  |      |
| NG313 | GD | 0.004  | 8  | 2    | 0 | 1 | 109 | 39  | 67 | 111 | 148 | 153 | 65  | 1579  | V                | 4    | 1812 | 10212 | L2.1 |
| NG314 | GD | 0.016  | 8  | 0.25 | 1 | 0 | 109 | 39  | 67 | 111 | 149 | 153 | 65  | 11115 | X III            | 4179 | 21   | 10350 | L2.5 |
| NG315 | GD | 0.0312 | 16 | 4    | 1 | 0 | 126 | 39  | 67 | 111 | 148 | 153 | 65  | 7365  | II               | 581  | 33   | 1866  | L2.3 |
| NG316 | GD | 0.25   | 16 | 32   | 0 | 0 | 126 | 39  | 67 | 111 | 146 | 153 | 65  | 9902  | X VII            | 182  | 870  | 10378 | L2.1 |
| NG317 | GD | 0.125  | 16 | 16   | 0 | 0 | 109 | 39  | 67 | 111 | 148 | 153 | 65  | 1579  | V                | 489  | 110  | 10367 | L2.1 |
| NG318 | GD | 0.125  | 16 | 16   | 1 | 0 | 59  | 39  | 67 | 78  | 148 | 153 | 65  | 7363  | XII/X X X VI     | 1226 | 137  | 10339 | L2.6 |
| NG319 | GD | 0.125  | 8  | 4    | 0 | 0 | 59  | 39  | 67 | 111 | 148 | 153 | 65  | 1583  | X VIII           | 6012 | 470  | 10238 | L2.1 |
| NG320 | GD | 0.125  | 8  | 16   | 0 | 1 | 109 | 39  | 67 | 111 | 148 | 153 | 65  | 1579  | V                | 6018 | 110  | 10244 | L2.1 |
| NG321 | GD | 0.125  | 16 | 8    | 0 | 1 | 59  | 39  | 67 | 158 | 148 | 153 | 65  | 7827  | X/X X X V        | 6001 | 21   | 10225 | L2.6 |
| NG322 | GD | 0.125  | 8  | 16   | 0 | 1 | 109 | 39  | 67 | 111 | 148 | 153 | 133 | 7367  | II               | 3029 | 1036 | 5062  | L2.1 |
| NG323 | GD | 0.125  | 16 | 16   | 1 | 0 | 126 | 39  | 67 | 78  | 148 | 153 | 65  | 1600  | V                | 1053 | 913  | 5114  | L2.1 |
| NG324 | GD | 0.125  | 16 | 8    | 0 | 0 | 59  | 39  | 67 | 158 | 148 | 153 | 65  | 7827  | X III            | 1132 | 4    | 2083  | L2.4 |
| NG325 | GD | 0.032  | 16 | 16   | 1 | 0 | 126 | 39  | 67 | 111 | 148 | 153 | 65  | 7365  | 50.001 (patial)  | 1971 | 33   | 3242  | L2.3 |
| NG326 | GD | 0.125  | 8  | 8    | 0 | 0 | 109 | 39  | 67 | 78  | 148 | 153 | 65  | 7356  | X III            | 4    | 752  | 4539  | L2.6 |
| NG327 | GD | 0.125  | 16 | 16   | 0 | 0 | 59  | 39  | 67 | 78  | 148 | 153 | 65  | 7363  | X/X X X V        | 3215 | 10   | 5308  | L2.8 |
| NG328 | TJ | 0.0625 | 8  | 4    | 0 | 0 | 59  | 39  | 67 | 111 | 148 | 153 | 65  | 1583  | X III            | 1715 | 547  | 10345 | L2.2 |
| NG329 | TJ | 0.008  | 8  | 8    | 0 | 0 | 59  | 39  | 67 | 78  | 148 | 153 | 65  | 7363  | XII/X X X VI     | 2978 | 1058 | 5061  | L2.6 |
| NG330 | TJ | 0.016  | 16 | 8    | 0 | 1 | 109 | 39  | 67 | 78  | 148 | 153 | 65  | 7356  | XII/X X X VI     | 1273 | 571  | 2438  | L2.6 |
| NG331 | TJ | 0.008  | 16 | 4    | 1 | 0 | 126 | 39  | 67 | 111 | 148 | 153 | 133 | 1580  | II               | 4    | 186  | 1731  | L2.3 |
| NG332 | TJ | 0.008  | 16 | 16   | 0 | 1 | 59  | 39  | 67 | 158 | 148 | 153 | 65  | 7827  | X III            | 1053 | 33   | 1614  | L2.4 |
| NG333 | TJ | 0.008  | 16 | 8    | 0 | 0 | 126 | 39  | 67 | 111 | 149 | 71  | 65  | 6714  | X XI             | 206  | 156  | 421   | L2.5 |
| NG334 | TJ | 0.016  | 16 | 8    | 0 | 0 | 109 | 39  | 67 | 111 | 148 | 153 | 65  | 1579  | V                | 4    | 4    | 225   | L2.1 |
| NG335 | TJ | 0.0625 | 16 | 8    | 0 | 0 | 109 | 39  | 67 | 78  | 148 | 153 | 65  | 7356  | X III            | 4    | 752  | 4539  | L2.6 |
| NG336 | SH | 0.004  | 4  | 16   | 0 | 0 | 126 | 39  | 67 | 111 | 146 | 153 | 65  | 9902  | V                | 1226 | 738  | 10390 | L2.1 |
| NG337 | SH | 0.03   | 16 | 32   | 1 | 1 | 126 | 39  | 67 | 111 | 148 | 153 | 65  | 7365  | X VIII           | 1226 | 137  | 10339 | L2.3 |
| NG338 | SH | 0.06   | 16 | 4    | 0 | 0 | 109 | 39  | 67 | 111 | 148 | 153 | 65  | 1579  | X/X X X V        | 4431 | 110  | 7393  | L2.1 |
| NG339 | SH | 0.016  | 8  | 1    | 0 | 1 | 59  | 112 | 67 | 158 | 148 | 153 | 65  | 11976 | 19.001 (partial) | 1448 | 4    | 4846  | L2.6 |
| NG340 | SH | 0.06   | 16 | 8    | 0 | 0 | 59  | 39  | 67 | 158 | 148 | 153 | 65  | 7827  | X III            | 1053 | 4    | 2318  | L2.4 |
| NG341 | SH | 0.016  | 8  | 16   | 0 | 0 | 59  | 39  | 67 | 111 | 148 | 153 | 65  | 1583  | X VIII           | 206  | 470  | 2268  | L2.1 |
| NG342 | SH | 0.004  | 8  | 8    | 1 | 0 | 126 | 39  | 67 | 158 | 148 | 153 | 65  | 1904  | II               | 581  | 33   | 1866  | L2.3 |
| NG343 | SH | 0.016  | 8  | 8    | 0 | 1 | 126 | 39  | 67 | 111 | 148 | 153 | 65  | 7365  | X III            | 90   | 21   | 436   | L2.5 |
| NG344 | JS | 0.03   | 16 | 8    | 1 | 1 | 126 | 39  | 67 | 111 | 148 | 153 | 65  | 7365  | II               | 5167 | 75   | 8725  | L2.3 |
| NG345 | JS | 0.03   | 16 | 8    | 1 | 1 | 126 | 39  | 67 | 111 | 148 | 153 | 65  | 7365  | II               | 5167 | 75   | 8725  | L2.3 |
| NG347 | JS | 0.03   | 16 | 16   | 0 | 1 | 126 | 39  | 67 | 111 | 146 | 153 | 65  | 9902  | V                | 5168 | 858  | 8726  | L2.1 |
| NG348 | JS | 0.03   | 16 | 16   | 0 | 0 | 109 | 39  | 67 | 78  | 148 | 153 | 65  | 7356  | XII/X X X VI     | 1053 | 137  | 8727  | L2.6 |
| NG349 | JS | 0.015  | 16 | 16   | 1 | 1 | 109 | 39  | 67 | 111 | 148 | 153 | 133 | 7367  | II               | 1135 | 446  | 1768  | L2.9 |
| NG350 | JS | 0.03   | 16 | 16   | 0 | 1 | 126 | 39  | 67 | 111 | 146 | 153 | 65  | 9902  | V                | 5168 | 858  | 8726  | L2.1 |
| NG351 | JS | 0.03   | 16 | 16   | 0 | 0 | 126 | 39  | 67 | 111 | 146 | 153 | 65  | 9902  | V                | 1445 | 738  | 3284  | L2.1 |
| NG352 | JS | 0.03   | 16 | 8    | 0 | 0 | 59  | 39  | 67 | 158 | 148 | 153 | 65  | 7827  | X III            | 5169 | 33   | 8729  | L2.4 |

|       |    |        |       |      |   |   |     |     |    |     |     |     |     |       |                  |      |      |       |      |
|-------|----|--------|-------|------|---|---|-----|-----|----|-----|-----|-----|-----|-------|------------------|------|------|-------|------|
| NG353 | JS | 0.06   | 16    | 8    | 1 | 1 | 126 | 39  | 67 | 78  | 148 | 153 | 65  | 1600  | X III            | 1132 | 33   | 1766  | L2.2 |
| NG354 | JS | 0.06   | 16    | 16   | 1 | 0 | 126 | 39  | 67 | 111 | 148 | 153 | 65  | 7365  | X XI             | 1422 | 33   | 8728  | L2.3 |
| NG355 | JS | 0.06   | 16    | 8    | 1 | 0 | 59  | 39  | 67 | 111 | 148 | 153 | 65  | 1583  | X III            | 5171 | 1586 | 8732  | L2.2 |
| NG356 | JS | 0.06   | 16    | 16   | 0 | 1 | 126 | 299 | 67 | 78  | 148 | 153 | 133 | 12981 | X XI             | 3580 | 156  | 5990  | L2.1 |
| NG357 | JS | 0.06   | 16    | 16   | 0 | 0 | 109 | 39  | 67 | 111 | 148 | 153 | 65  | 1579  | V                | 1275 | 4    | 2016  | L2.1 |
| NG358 | JS | 0.06   | 8     | 8    | 1 | 0 | 126 | 39  | 67 | 111 | 148 | 153 | 65  | 7365  | X III            | 5166 | 33   | 8724  | L2.3 |
| NG359 | JS | 0.06   | 16    | 8    | 0 | 1 | 59  | 39  | 67 | 158 | 148 | 153 | 65  | 7827  | X III            | 1053 | 4    | 2318  | L2.4 |
| NG360 | JS | 0.06   | 16    | 8    | 0 | 1 | 59  | 39  | 67 | 158 | 148 | 153 | 65  | 7827  | X III            | 1053 | 4    | 2318  | L2.4 |
| NG361 | JS | 0.06   | 16    | 16   | 1 | 0 | 126 | 39  | 67 | 78  | 148 | 153 | 65  | 1600  | X III            | 1132 | 33   | 1766  | L2.2 |
| NG362 | JS | 0.06   | 16    | 16   | 1 | 1 | 59  | 112 | 67 | 157 | 148 | 153 | 65  | 11191 | X III            | 251  | 483  | 1927  | L2.7 |
| NG363 | JS | 0.06   | 16    | 16   | 0 | 0 | 109 | 39  | 67 | 111 | 148 | 153 | 65  | 1579  | V                | 3996 | 33   | 6691  | L2.1 |
| NG364 | ZJ | 0.032  | 16    | 8    | 0 | 0 | 109 | 39  | 67 | 111 | 148 | 153 | 65  | 1579  | V                | 5541 | 110  | 10402 | L2.1 |
| NG365 | ZJ | 0.016  | 16    | 8    | 0 | 1 | 59  | 112 | 67 | 157 | 148 | 153 | 65  | 11191 | X III            | 760  | 483  | 10410 | L2.7 |
| NG366 | ZJ | 0.0625 | 16    | 8    | 0 | 1 | 59  | 39  | 67 | 158 | 148 | 153 | 65  | 7827  | X III            | 1053 | 4    | 2318  | L2.4 |
| NG367 | ZJ | 0.0625 | 16    | 2    | 0 | 1 | 59  | 39  | 67 | 158 | 148 | 153 | 65  | 7827  | X III            | 1448 | 4    | 4846  | L2.6 |
| NG368 | ZJ | 0.0625 | 16    | 8    | 0 | 0 | 109 | 39  | 67 | 158 | 148 | 153 | 65  | 9304  | X VIII           | 2035 | 526  | 3356  | L2.1 |
| NG369 | ZJ | 0.032  | 16    | 8    | 1 | 0 | 126 | 39  | 67 | 158 | 148 | 153 | 65  | 1904  | II               | 505  | 33   | 2277  | L2.3 |
| NG370 | HN | 0.125  | 16    | 32   | 0 | 0 | 59  | 39  | 67 | 111 | 148 | 153 | 65  | 1583  | X VIII           | 6524 | 1780 | 11190 | L2.1 |
| NG371 | HN | 0.25   | 16    | 2    | 1 | 0 | 126 | 39  | 67 | 78  | 148 | 153 | 65  | 1600  | IX               | 6525 | 324  | 11191 | L2.5 |
| NG372 | HN | 0.25   | 16    | 2    | 1 | 0 | 59  | 39  | 67 | 158 | 148 | 71  | 65  | 1588  | X VIII           | 6529 | 21   | 11195 | L2.6 |
| NG373 | HN | 0.25   | 16    | 2    | 0 | 1 | 59  | 39  | 67 | 78  | 148 | 153 | 133 | 1587  | X XI             | 6535 | 33   | 11203 | L2.6 |
| NG374 | HN | 0.125  | 16    | 4    | 0 | 0 | 59  | 39  | 67 | 158 | 148 | 153 | 65  | 7827  | X III            | 1053 | 1942 | 11169 | L2.4 |
| NG375 | HN | 0.125  | 16    | 8    | 0 | 0 | 59  | 39  | 67 | 158 | 148 | 153 | 65  | 7827  | X III            | 1053 | 287  | 11175 | L2.4 |
| NG376 | HN | 0.25   | 16    | 16   | 0 | 0 | 109 | 39  | 67 | 78  | 148 | 153 | 65  | 7356  | X III            | 4    | 752  | 4539  | L2.6 |
| NG377 | HN | 0.03   | 16    | 1    | 0 | 0 | 59  | 39  | 67 | 158 | 148 | 153 | 65  | 7827  | X III            | 251  | 4    | 4367  | L2.4 |
| NG378 | HN | 0.25   | 8     | 8    | 0 | 0 | 109 | 39  | 67 | 111 | 148 | 153 | 133 | 7367  | II               | 3029 | 1036 | 5062  | L2.1 |
| NG379 | HN | 0.125  | 16    | 8    | 0 | 0 | 59  | 39  | 67 | 158 | 148 | 153 | 65  | 7827  | X III            | 1053 | 21   | 3435  | L2.4 |
| NG380 | CQ | 0.015  | 32    | 16   | 1 | 1 | 126 | 39  | 67 | 78  | 149 | 71  | 65  | 1927  | X XII            | 6490 | 21   | 11128 | L2.5 |
| NG381 | CQ | 0.015  | 16    | 16   | 1 | 1 | 59  | 39  | 67 | 158 | 148 | 71  | 65  | 1588  | X IX             | 6486 | 137  | 11124 | L2.6 |
| NG382 | CQ | 0.125  | 16    | 16   | 0 | 1 | 59  | 39  | 67 | 158 | 148 | 71  | 133 | 12982 | X III            | 6485 | 107  | 11123 | L2.1 |
| NG383 | CQ | 0.06   | 32    | 16   | 1 | 1 | 126 | 39  | 67 | 158 | 148 | 153 | 65  | 1904  | X III            | 6478 | 1934 | 11121 | L2.4 |
| NG384 | CQ | 0.06   | 32    | 16   | 0 | 1 | 126 | 39  | 67 | 111 | 148 | 153 | 65  | 7365  | X III            | 5228 | 21   | 11119 | L2.5 |
| NG385 | CQ | 0.03   | 32    | 4    | 1 | 1 | 126 | 39  | 67 | 111 | 148 | 153 | 65  | 7365  | X VIII           | 1448 | 186  | 2325  | L2.3 |
| NG386 | CQ | 0.015  | 16    | 16   | 1 | 0 | 59  | 39  | 67 | 158 | 148 | 153 | 65  | 7827  | X III            | 1132 | 4    | 2083  | L2.4 |
| NG387 | CQ | 0.03   | 32    | 16   | 1 | 1 | 126 | 39  | 67 | 158 | 148 | 153 | 65  | 1904  | II               | 581  | 33   | 1866  | L2.3 |
| NG388 | SC | 0.125  | 32    | 4    | 0 | 0 | 59  | 39  | 67 | 158 | 148 | 153 | 65  | 7827  | X III            | 5692 | 186  | 11244 | L2.6 |
| NG389 | SC | 0.125  | 32    | ≥16  | 1 | 0 | 59  | 39  | 67 | 158 | 148 | 153 | 65  | 7827  | X III            | 5174 | 4    | 11238 | L2.4 |
| NG390 | SC | 0.125  | 16    | 16   | 1 | 0 | 59  | 39  | 67 | 78  | 147 | 71  | 65  | 11961 | X VIII           | 328  | 1830 | 11229 | L2.2 |
| NG391 | SC | 0.125  | 16    | ≥16  | 1 | 0 | 126 | 39  | 67 | 78  | 148 | 153 | 65  | 1600  | X VIII           | 1053 | 186  | 3289  | L2.5 |
| NG392 | SC | 0.125  | 32    | ≥16  | 1 | 1 | 109 | 39  | 67 | 111 | 148 | 153 | 133 | 7367  | II               | 3029 | 1036 | 5062  | L2.1 |
| NG393 | SC | 0.125  | 32    | ≥16  | 1 | 1 | 59  | 39  | 67 | 78  | 148 | 153 | 65  | 7363  | X/X X X V        | 917  | 10   | 1424  | L2.8 |
| NG394 | SC | 0.125  | 32    | ≥16  | 1 | 0 | 59  | 39  | 67 | 78  | 148 | 153 | 65  | 7363  | X/X X X V        | 917  | 10   | 1424  | L2.8 |
| NG395 | SC | 0.03   | 16    | 16   | 0 | 0 | 59  | 39  | 67 | 158 | 148 | 153 | 65  | 7827  | X III            | 1132 | 33   | 1766  | L2.4 |
| NG396 | SC | 0.03   | 64    | 0.25 | 0 | 0 | 109 | 39  | 67 | 78  | 149 | 71  | 65  | 10931 | 22.001 (partial) | 318  | 74   | 912   | L2.5 |
| NG397 | SC | 0.016  | 16    | ≥16  | 0 | 1 | 109 | 39  | 67 | 111 | 148 | 153 | 133 | 7367  | X XI             | 5924 | 4    | 10091 | L2.1 |
| NG398 | SC | 0.016  | 0.016 | 16   | 0 | 0 | 109 | 39  | 67 | 111 | 148 | 153 | 65  | 1579  | II               | 3029 | 1036 | 5062  | L2.1 |
| NG399 | SC | 0.016  | 16    | ≥16  | 1 | 1 | 126 | 39  | 67 | 78  | 148 | 153 | 65  | 1600  | X III            | 1132 | 33   | 1766  | L2.2 |
| NG400 | SC | 0.08   | 32    | 4    | 0 | 1 | 59  | 39  | 67 | 158 | 148 | 153 | 65  | 7827  | X IX             | 1448 | 4    | 4846  | L2.6 |
| NG401 | SC | ≤0.004 | 8     | 8    | 0 | 1 | 126 | 39  | 67 | 111 | 148 | 153 | 65  | 7365  | X XI             | 4    | 186  | 1731  | L2.3 |
| NG402 | SC | 0.06   | 16    | 16   | 1 | 1 | 109 | 39  | 67 | 111 | 148 | 153 | 133 | 7367  | X XI             | 1135 | 446  | 1768  | L2.9 |

|       |    |        |    |       |   |   |     |    |    |     |     |     |     |       |                  |      |      |       |      |
|-------|----|--------|----|-------|---|---|-----|----|----|-----|-----|-----|-----|-------|------------------|------|------|-------|------|
| NG403 | TJ | 0.032  | 16 | 8     | 0 | 0 | 109 | 39 | 67 | 158 | 148 | 153 | 65  | 9304  | X VIII           | 2035 | 526  | 3356  | L2.1 |
| NG404 | TJ | 0.032  | 16 | 8     | 0 | 0 | 59  | 39 | 67 | 158 | 148 | 153 | 65  | 7827  | X III            | 1053 | 186  | 3289  | L2.4 |
| NG405 | TJ | 0.008  | 16 | 32    | 0 | 1 | 109 | 39 | 67 | 111 | 148 | 153 | 65  | 1579  | V                | 6054 | 33   | 10308 | L2.1 |
| NG406 | TJ | 0.016  | 16 | 16    | 0 | 0 | 126 | 39 | 67 | 78  | 146 | 153 | 65  | 1601  | V                | 6043 | 75   | 10293 | L2.1 |
| NG407 | TJ | 0.016  | 8  | 8     | 0 | 0 | 126 | 39 | 67 | 111 | 147 | 153 | 65  | 11196 | X III            | 6048 | 156  | 10301 | L2.5 |
| NG408 | TJ | 0.016  | 16 | 16    | 0 | 0 | 126 | 39 | 67 | 78  | 146 | 153 | 65  | 1601  | V                | 609  | 75   | 10394 | L2.1 |
| NG409 | SH | 0.03   | 16 | 8     | 0 | 0 | 109 | 39 | 67 | 111 | 148 | 153 | 65  | 1579  | V                | 1912 | 186  | 10385 | L2.1 |
| NG410 | SH | 0.004  | 8  | 8     | 1 | 1 | 126 | 39 | 67 | 111 | 146 | 153 | 65  | 9902  | V                | 6036 | 858  | 10284 | L2.1 |
| NG411 | SH | 0.016  | 4  | 4     | 1 | 1 | 126 | 39 | 67 | 78  | 149 | 71  | 65  | 1927  | X XI             | 6034 | 156  | 10282 | L2.5 |
| NG413 | GD | 0.032  | 16 | 8     | 1 | 1 | 126 | 39 | 67 | 78  | 148 | 153 | 65  | 1600  | X III            | 2261 | 186  | 3741  | L2.6 |
| NG414 | GD | 0.032  | 16 | 16    | 1 | 1 | 126 | 39 | 67 | 111 | 148 | 153 | 65  | 7365  | X XI             | 1132 | 33   | 1766  | L2.3 |
| NG415 | GD | 0.0312 | 16 | 4     | 1 | 0 | 126 | 39 | 67 | 111 | 148 | 153 | 65  | 7365  | IX               | 581  | 33   | 1866  | L2.3 |
| NG416 | GD | 0.016  | 16 | 16    | 0 | 1 | 109 | 39 | 67 | 111 | 148 | 153 | 133 | 7367  | II               | 1135 | 446  | 1768  | L2.9 |
| NG417 | GD | 0.016  | 16 | 8     | 1 | 1 | 126 | 39 | 67 | 111 | 148 | 153 | 65  | 7365  | X XI             | 4    | 4    | 225   | L2.3 |
| NG418 | GD | 0.032  | 16 | 4     | 0 | 0 | 109 | 39 | 67 | 111 | 148 | 153 | 65  | 1579  | X III            | 6002 | 1360 | 10226 | L2.1 |
| NG419 | GD | 0.008  | 16 | 8     | 0 | 1 | 109 | 39 | 67 | 111 | 148 | 153 | 133 | 7367  | II               | 3029 | 1036 | 5062  | L2.1 |
| NG420 | HN | 0.125  | 16 | 8     | 0 | 1 | 59  | 39 | 67 | 158 | 148 | 153 | 65  | 7827  | X III            | 6530 | 4    | 11196 | L2.4 |
| NG421 | HN | 0.125  | 16 | 16    | 0 | 0 | 126 | 39 | 67 | 111 | 148 | 153 | 133 | 1580  | X XI             | 6532 | 33   | 11199 | L2.1 |
| NG422 | HN | 0.125  | 16 | 16    | 0 | 0 | 126 | 39 | 67 | 111 | 148 | 153 | 133 | 1580  | X XI             | 6533 | 33   | 11200 | L2.1 |
| NG423 | HN | 0.06   | 16 | 2     | 0 | 0 | 59  | 39 | 67 | 158 | 148 | 153 | 65  | 7827  | X III            | 1448 | 4    | 4846  | L2.6 |
| NG424 | HN | 0.03   | 16 | 4     | 0 | 0 | 126 | 39 | 67 | 158 | 148 | 153 | 65  | 1904  | 13.001 (partial) | 5924 | 4    | 10091 | L2.3 |
| NG425 | HN | 0.03   | 8  | 1     | 1 | 1 | 126 | 39 | 67 | 78  | 148 | 153 | 65  | 1600  | X III            | 1132 | 33   | 1766  | L2.2 |
| NG426 | HN | 0.03   | 8  | 0.125 | 1 | 0 | 126 | 39 | 67 | 158 | 148 | 153 | 133 | 7828  | IX               | 1053 | 33   | 1614  | L2.6 |
| NG427 | HN | 0.03   | 16 |       | 0 | 0 | 109 | 39 | 67 | 78  | 149 | 71  | 65  | 10931 | 22.001 (partial) | 318  | 74   | 912   | L2.5 |
| NG428 | CQ | 0.03   | 32 | 16    | 1 | 1 | 109 | 39 | 67 | 111 | 148 | 153 | 133 | 7367  | II               | 3029 | 1036 | 5062  | L2.1 |
| NG429 | CQ | 0.03   | 16 | 16    | 1 | 1 | 126 | 39 | 67 | 78  | 148 | 153 | 65  | 1600  | X III            | 1132 | 33   | 1766  | L2.2 |
| NG430 | GD | 0.032  | 16 | 16    | 1 | 0 | 126 | 39 | 67 | 111 | 148 | 153 | 65  | 7365  | X III            | 6000 | 33   | 10224 | L2.3 |
| NG431 | GD | 0.016  | 16 | 0.5   | 0 | 0 | 126 | 39 | 67 | 111 | 148 | 153 | 65  | 7365  | X XI             | 1135 | 33   | 3285  | L2.3 |
| NG432 | GD | 0.008  | 16 | 16    | 1 | 1 | 126 | 39 | 67 | 111 | 148 | 154 | 65  | 9899  | X XI             | 543  | 75   | 1393  | L2.6 |
| NG433 | JS | 0.06   | 16 | 8     | 1 | 1 | 59  | 39 | 67 | 111 | 148 | 153 | 65  | 1583  | 87.001           | 866  | 156  | 1750  | L2.2 |
| NG434 | JS | 0.06   | 16 | 16    | 0 | 0 | 59  | 39 | 67 | 158 | 148 | 153 | 65  | 7827  | X III            | 1053 | 4    | 2318  | L2.4 |
| NG435 | SH | 0.03   | 4  | 4     | 1 | 0 | 59  | 39 | 67 | 78  | 148 | 153 | 65  | 7363  | X VIII           | 2894 | 1828 | 10271 | L2.5 |
| NG436 | SH | 0.03   | 16 | 16    | 0 | 0 | 109 | 39 | 67 | 111 | 148 | 153 | 65  | 1579  | V                | 1053 | 110  | 3702  | L2.1 |
| NG437 | SH | 0.03   | 16 | 8     | 0 | 0 | 109 | 39 | 67 | 78  | 148 | 153 | 65  | 7356  | X VIII           | 90   | 33   | 568   | L2.1 |
| NG438 | SH | 0.03   | 16 | 16    | 1 | 1 | 126 | 39 | 67 | 78  | 148 | 153 | 65  | 1600  | X VIII           | 609  | 33   | 4745  | L2.5 |
| NG439 | SH | 0.03   | 4  | 16    | 0 | 0 | 109 | 39 | 67 | 111 | 147 | 153 | 65  | 6960  | X VIII           | 6035 | 1473 | 10283 | L2.1 |
| NG440 | SH | 0.03   | 16 | 16    | 0 | 0 | 126 | 39 | 67 | 111 | 146 | 153 | 65  | 9902  | X VIII           | 182  | 186  | 2051  | L2.1 |

**Table S4: Summary of specific nucleotides and deduced amino acids for lineage 1 (L1) and lineage 2 (L2)**

| Gene (ID <sup>*</sup> )  | Product                                              | Nucleotides |     |          | Amino acids <sup>§</sup> |          |          |
|--------------------------|------------------------------------------------------|-------------|-----|----------|--------------------------|----------|----------|
|                          |                                                      | Position    | L1  | L2       | Position                 | L1       | L2       |
| <i>gatC</i><br>(NGO0663) | aspartyl/glutamyl-tRNA<br>amidotransferase subunit C | 65          | C   | A        | 22                       | <u>A</u> | <u>E</u> |
|                          |                                                      | 106         | G   | A        | 36                       | <u>A</u> | <u>I</u> |
|                          |                                                      | 221         | T   | C        | 74                       | <u>V</u> | <u>A</u> |
|                          |                                                      | 237         | C   | T        | 79                       | V        | V        |
|                          |                                                      | 240         | A   | G        | 80                       | A        | A        |
| <i>gatA</i><br>(NGO0662) | aspartyl/glutamyl-tRNA<br>amidotransferase subunit A | 6           | A   | C        | 2                        | T        | T        |
|                          |                                                      | 28          | A   | G        | 10                       | <u>S</u> | <u>G</u> |
|                          |                                                      | 31          | G   | A        | 11                       | <u>G</u> | <u>S</u> |
|                          |                                                      | 32          | T   | G        | 11                       | <u>I</u> | <u>S</u> |
|                          |                                                      | 69          | A   | G        | 23                       | L        | L        |
|                          |                                                      | 108         | T   | C        | 36                       | P        | P        |
|                          |                                                      | 171         | T   | C        | 57                       | D        | D        |
|                          |                                                      | 265         | A   | G        | 89                       | <u>I</u> | <u>A</u> |
|                          |                                                      | 266         | G   | C        | 89                       | <u>G</u> | <u>A</u> |
|                          |                                                      | 279         | G   | C        | 93                       | L        | L        |
|                          |                                                      | 336         | C   | T        | 112                      | G        | G        |
|                          |                                                      | 456         | C   | A        | 152                      | S        | S        |
|                          |                                                      | 513         | T   | C        | 171                      | D        | D        |
|                          |                                                      | 540         | G   | A        | 180                      | A        | A        |
|                          |                                                      | 597         | C   | T        | 199                      | G        | G        |
|                          |                                                      | 717         | G   | A        | 239                      | E        | E        |
|                          |                                                      | 759         | T   | C        | 253                      | L        | L        |
|                          |                                                      | 766         | A   | G        | 256                      | <u>M</u> | <u>V</u> |
|                          |                                                      | 835         | C   | A        | 279                      | <u>H</u> | <u>N</u> |
|                          |                                                      | 837         | T   | C        | 279                      | N        | N        |
| 846                      | C                                                    | T           | 282 | D        | D                        |          |          |
| 847                      | C                                                    | T           | 283 | L        | L                        |          |          |
| 849                      | C                                                    | G           | 283 | <u>F</u> | <u>L</u>                 |          |          |
| 852                      | C                                                    | G           | 284 | L        | L                        |          |          |
| 1089                     | A                                                    | G           | 363 | L        | L                        |          |          |
| 1328                     | A                                                    | G           | 443 | <u>D</u> | <u>G</u>                 |          |          |
| 1338                     | A                                                    | G           | 446 | L        | L                        |          |          |
| 1342                     | A                                                    | G           | 448 | <u>I</u> | <u>V</u>                 |          |          |
| 1357                     | A                                                    | G           | 453 | <u>I</u> | <u>V</u>                 |          |          |
| 1416                     | T                                                    | C           | 472 | N        | N                        |          |          |



|             |                            |     |   |   |     |          |          |
|-------------|----------------------------|-----|---|---|-----|----------|----------|
| <i>gatB</i> | aspartyl/glutamyl-tRNA     | 6   | C | T | 2   | T        | T        |
| (NGO0660)   | amidotransferase subunit B | 15  | C | T | 5   | T        | T        |
|             |                            | 72  | C | T | 24  | G        | G        |
|             |                            | 79  | G | A | 27  | <u>A</u> | <u>I</u> |
|             |                            | 91  | T | G | 31  | <u>S</u> | <u>A</u> |
|             |                            | 123 | G | A | 41  | E        | E        |
|             |                            | 159 | G | C | 53  | R        | R        |
|             |                            | 186 | G | A | 62  | L        | L        |
|             |                            | 195 | C | T | 65  | A        | A        |
|             |                            | 198 | A | G | 66  | L        | L        |
|             |                            | 204 | G | A | 68  | A        | A        |
|             |                            | 213 | T | C | 71  | N        | N        |
|             |                            | 215 | A | G | 72  | <u>Q</u> | <u>R</u> |
|             |                            | 261 | C | G | 87  | P        | P        |
|             |                            | 279 | T | C | 93  | S        | S        |
|             |                            | 288 | C | T | 96  | D        | D        |
|             |                            | 291 | A | G | 97  | L        | L        |
|             |                            | 324 | A | G | 108 | V        | V        |
|             |                            | 332 | A | G | 111 | <u>D</u> | <u>G</u> |
|             |                            | 360 | T | C | 120 | R        | R        |
|             |                            | 387 | G | A | 129 | K        | K        |
|             |                            | 396 | T | C | 132 | H        | H        |
|             |                            | 399 | A | G | 133 | E        | E        |
|             |                            | 420 | T | C | 140 | G        | G        |
|             |                            | 471 | T | C | 157 | P        | P        |
|             |                            | 537 | A | G | 179 | L        | L        |
|             |                            | 570 | A | G | 190 | S        | S        |
|             |                            | 577 | G | A | 193 | <u>V</u> | <u>I</u> |
|             |                            | 597 | G | T | 199 | V        | V        |
|             |                            | 609 | T | C | 203 | G        | G        |
|             |                            | 614 | A | C | 205 | <u>E</u> | <u>A</u> |
|             |                            | 615 | A | G | 205 | A        | A        |
|             |                            | 618 | T | A | 206 | <u>D</u> | <u>E</u> |
|             |                            | 636 | G | A | 212 | E        | E        |

\* IDs are refer to the reference genome of *N. gonorrhoeae* FA1090 (GenBank accession: NC\_002946);

§ Different amino acids between L1 and L2 are underlined.

**Table S5: Summary of L2 sublineage specific nucleotides\***

| Sub-lineage | Gene/Intergenic ID | Genomic location | Reference nucleotide | Specific nucleotide | Mutation type |
|-------------|--------------------|------------------|----------------------|---------------------|---------------|
| <b>L2.1</b> | NGO0963-NGO0968    | 939,972          | G                    | A                   | noncoding     |
|             | NGO1308            | 1,266,350        | C                    | T                   | synonymous    |
|             | NGO1308            | 1,266,530        | C                    | T                   | synonymous    |
| <b>L2.2</b> | NGO1954-NGO1955    | 1,926,844        | A                    | G <sup>§</sup>      | noncoding     |
|             | NGO2020            | 1,990,506        | C                    | T                   | nonsynonymous |
| <b>L2.3</b> | NGO0089            | 97,793           | C                    | T                   | synonymous    |
|             | NGO0187            | 188,878          | G                    | A                   | nonsynonymous |
|             | NGO0435            | 428,633          | G                    | A                   | nonsynonymous |
|             | NGO1205            | 1,151,437        | C                    | A                   | synonymous    |
| <b>L2.4</b> | NGO0110            | 122,722          | C                    | T                   | nonsynonymous |
|             | NGO0186-NGO0187    | 187,520          | A                    | G                   | noncoding     |
|             | NGO0335            | 330,758          | C                    | T                   | synonymous    |
|             | NGO0781            | 775,415          | C                    | T                   | nonsynonymous |
|             | NGO0921            | 902,281          | C                    | T                   | synonymous    |
|             | NGO_t18-NGO1024    | 986,226          | C                    | G                   | noncoding     |
|             | NGO1562            | 1,535,448        | G                    | A                   | nonsynonymous |
|             | NGO1851-NGO1852    | 1,823,648        | G                    | A                   | noncoding     |
| <b>L2.5</b> | NGO0553            | 529,583          | C                    | T                   | synonymous    |
|             | NGO0553            | 530,635          | C                    | T                   | nonsynonymous |
| <b>L2.6</b> | NGO0186            | 186,796          | A                    | G                   | nonsynonymous |
|             | NGO0328-NGO0329    | 325,581          | A                    | G                   | noncoding     |
|             | NGO1152-NGO1154    | 1,093,479        | A                    | G                   | noncoding     |
|             | NGO2023-NGO2024    | 1,994,932        | G                    | A                   | noncoding     |
|             | NGO2026            | 1,996,783        | A                    | G                   | nonsynonymous |
| <b>L2.7</b> | NGO0789            | 781,842          | G                    | G                   | -             |
|             | NGO1835            | 1,804,390        | C                    | C                   | -             |
| <b>L2.8</b> | NGO0318-NGO_t07    | 317,522          | C                    | T                   | noncoding     |
|             | NGO0988            | 959,831          | G                    | A                   | nonsynonymous |
| <b>L2.9</b> | NGO0754-NGO0755    | 752,122          | C                    | G                   | noncoding     |
|             | NGO0754-NGO0755    | 752,128          | G                    | A                   | noncoding     |
|             | NGO1150            | 1,090,354        | G                    | C                   | nonsynonymous |

\* All IDs and genomic locations are refer to the reference genome of *N. gonorrhoeae* FA1090 (GenBank accession: NC\_002946); <sup>§</sup> Shared with L2.3.

**Table S6: Summary of statistical analysis of MICs.**

|               | <b>Number (MIC)</b> | <b>p value (t test)</b> |
|---------------|---------------------|-------------------------|
| <b>ST1600</b> |                     |                         |
| L2.2          | 23(0.064±0.067mg/L) | <b>0.408</b>            |
| L2.6          | 10(0.045±0.034mg/L) |                         |
| <b>ST7363</b> |                     |                         |
| L2.6          | 13(0.054±0.043mg/L) | <b>0.007</b>            |
| L2.8          | 11(0.134±0.085mg/L) |                         |
| <b>ST7365</b> |                     |                         |
| L2.3          | 36(0.046±0.049mg/L) | <b>0.004</b>            |
| L2.5          | 15(0.107±0.096mg/L) |                         |
| <b>ST7367</b> |                     |                         |
| L2.1          | 23(0.057±0.061mg/L) | <b>0.728</b>            |
| L2.9          | 12(0.066±0.089mg/L) |                         |
| <b>ST7827</b> |                     |                         |
| L2.4          | 48(0.071±0.052mg/L) | <b>0.453</b>            |
| L2.6          | 26(0.061±0.059mg/L) |                         |

**Table S7: Results of ceftriaxone genetic resistance determinants**

| Resistant determinants | Cfx-DS isolates (n=207) | Cfx-S isolates (n=418) |
|------------------------|-------------------------|------------------------|
| PBP2                   |                         |                        |
| A501T                  | 21                      | 39                     |
| A501V                  | 59                      | 158                    |
| G542S                  | 28                      | 57                     |
| P551S                  | 41                      | 85                     |
| P551L                  | 2                       | 17                     |
| PORB                   |                         |                        |
| G120K                  | 94                      | 221                    |
| G120D                  | 5                       | 35                     |
| A121D                  | 71                      | 171                    |
| MTRR                   |                         |                        |
| G45D                   | 41                      | 122                    |

**Table S8: Characteristics of ceftriaxone-resistant isolates**

| Identification | Geographic site | Ceftriaxone MIC | penA type by NG-STAR | mosaic penA | pen A |       |       | porB  |       |      | MLST ST | NG-MAST ST | NG-STAR ST | Lineage |
|----------------|-----------------|-----------------|----------------------|-------------|-------|-------|-------|-------|-------|------|---------|------------|------------|---------|
|                |                 |                 |                      |             | A501  | G542  | P551  | G120  | A121  | G45  |         |            |            |         |
| NG014          | Zhejiang        | 0.5             | 34                   | Yes         | WT    | WT    | WT    | G120K | A121N | WT   | 1579    | 10332      | 627        | L2.1    |
| NG060          | Guangxi         | 0.25            | 10                   | Yes         | WT    | WT    | WT    | G120K | A121D | G45D | 7363    | 1424       | 4          | L2.8    |
| NG086          | Chongqing       | 0.25            | 5                    | No          | WT    | G542S | WT    | G120K | A121D | WT   | 9902    | 11115      | 225        | L2.1    |
| NG163          | Guangdong       | 0.25            | 43                   | No          | A501V | WT    | WT    | G120D | WT    | WT   | 1600    | 13663      | 929        | L2.2    |
| NG180          | Hainan          | 0.25            | 13                   | No          | A501V | WT    | P551S | WT    | WT    | WT   | 7827    | 9652       | 1100       | L2.6    |
| NG196          | Hainan          | 0.25            | 13                   | No          | A501V | WT    | P551S | G120K | A121D | G45D | 7827    | 2318       | 1101       | L2.4    |
| NG201          | Sichuan         | 0.25            | 10                   | Yes         | WT    | WT    | WT    | G120K | A121D | G45D | 7363    | 1424       | 4          | L2.8    |
| NG215          | Sichuan         | 0.25            | 12                   | No          | A501V | WT    | P551S | G120K | A121N | WT   | 7365    | 11226      | 1106       | L2.5    |
| NG216          | Sichuan         | 0.25            | 4                    | No          | WT    | G542S | WT    | G120K | A121G | WT   | 1963    | 11236      | 1107       | L2.1    |
| NG217          | Sichuan         | 0.25            | 43                   | No          | A501V | WT    | WT    | G120K | A121D | WT   | 12515   | 11241      | 114        | L2.3    |
| NG218          | Sichuan         | 0.25            | 21                   | No          | A501V | WT    | WT    | G120K | A121D | WT   | 6960    | 11243      | 1118       | L2.6    |
| NG219          | Sichuan         | 0.25            | 18                   | No          | WT    | WT    | WT    | G120D | WT    | G45D | 1597    | 2083       | 1102       | L2.2    |
| NG220          | Sichuan         | 0.25            | 2                    | No          | WT    | WT    | WT    | G120K | A121D | G45D | 7365    | 8784       | 73         | L2.3    |
| NG221          | Sichuan         | 0.25            | 18                   | No          | A501V | G542S | WT    | G120K | A121G | WT   | 11648   | 11245      | 346        | L2.2    |
| NG222          | Sichuan         | 0.25            | 12                   | No          | A501V | WT    | P551S | G120K | A121D | WT   | 7365    | 3435       | 1103       | L2.5    |
| NG276          | Guangxi         | 0.5             | 2                    | No          | WT    | WT    | WT    | G120K | A121D | G45D | 1904    | 11129      | 73         | L2.3    |
| NG281          | Tianjin         | 0.25            | 10                   | Yes         | WT    | WT    | WT    | G120K | A121D | G45D | 7363    | 1424       | 4          | L2.8    |
| NG296          | Guangdong       | 0.25            | 18                   | No          | A501T | G542S | WT    | G120K | A121G | G45D | 1928    | 10339      | 1104       | L2.3    |
| NG297          | Guangdong       | 0.25            | 43                   | No          | WT    | WT    | WT    | G120K | A121D | WT   | 1600    | 2841       | 513        | L2.2    |
| NG298          | Guangdong       | 0.25            | 2                    | No          | WT    | WT    | WT    | G120K | A121N | WT   | 7367    | 10241      | 1105       | L2.9    |
| NG299          | Guangdong       | 0.25            | 12                   | No          | A501V | WT    | P551S | G120K | A121N | WT   | 7365    | 10242      | 1106       | L2.5    |
| NG300          | Guangdong       | 0.25            | 2                    | No          | WT    | WT    | P551S | G120K | A121N | WT   | 7367    | 5061       | 1108       | L2.9    |
| NG301          | Guangdong       | 0.25            | 12                   | No          | A501V | WT    | WT    | G120K | A121D | WT   | 7365    | 10242      | 1106       | L2.5    |
| NG316          | Guangdong       | 0.25            | 17                   | No          | A501V | G542S | P551L | G120K | A121D | WT   | 9902    | 10378      | 1109       | L2.1    |
| NG371          | Hainan          | 0.25            | 18                   | No          | WT    | WT    | P551L | G120K | A121D | WT   | 1600    | 11191      | 1110       | L2.5    |
| NG372          | Hainan          | 0.25            | 18                   | No          | A501T | G542S | WT    | G120K | A121D | WT   | 1588    | 11195      | 1111       | L2.6    |
| NG373          | Hainan          | 0.25            | 21                   | No          | A501V | WT    | WT    | G120K | WT    | WT   | 1587    | 11203      | 1112       | L2.6    |
| NG376          | Hainan          | 0.25            | 18                   | No          | A501V | WT    | P551S | G120K | A121D | G45D | 7356    | 4539       | 495        | L2.6    |
| NG378          | Hainan          | 0.25            | 2                    | No          | WT    | WT    | WT    | G120K | A121D | WT   | 7367    | 5062       | 470        | L2.1    |

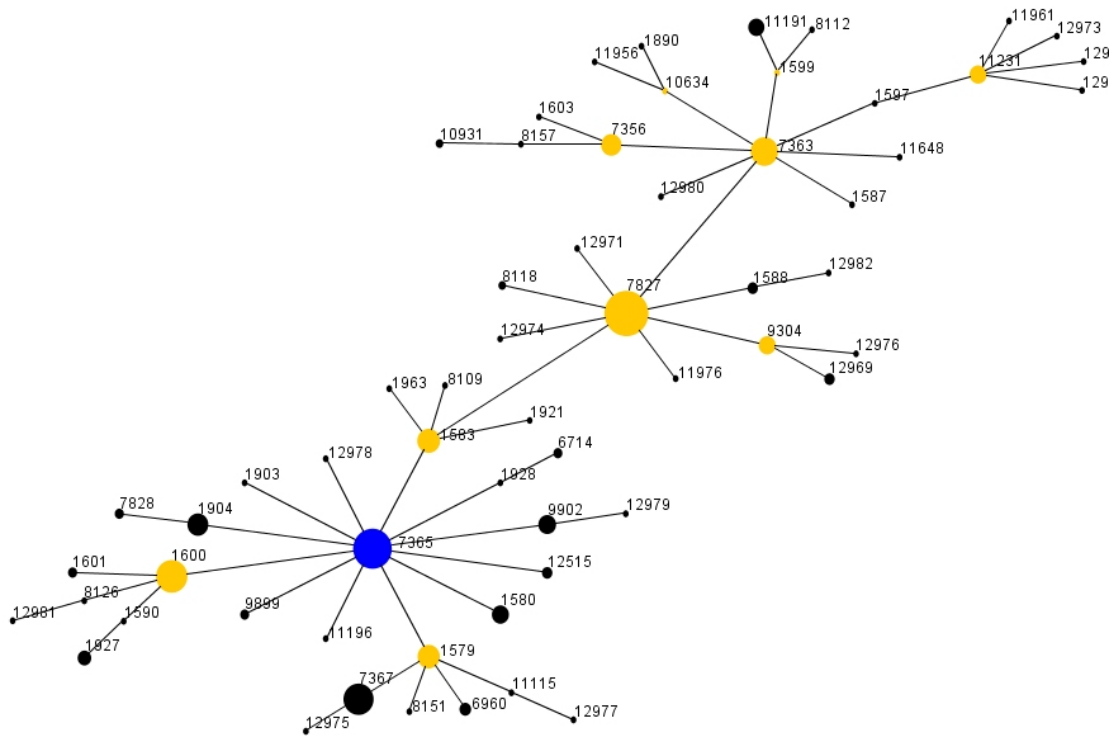

**Figure S1: eBURST analysis of 60 STs obtained from isolates collected in this study**

eBURST analysis showing the ST relationship of 437 *N. gonorrhoeae* isolates sequenced in this study. The predicted founding genotype was coloured in blue, while subgroup founders were coloured in yellow. STs with single locus variance were linked with a solid line. Frequency of each ST was proportional to the size of circle.

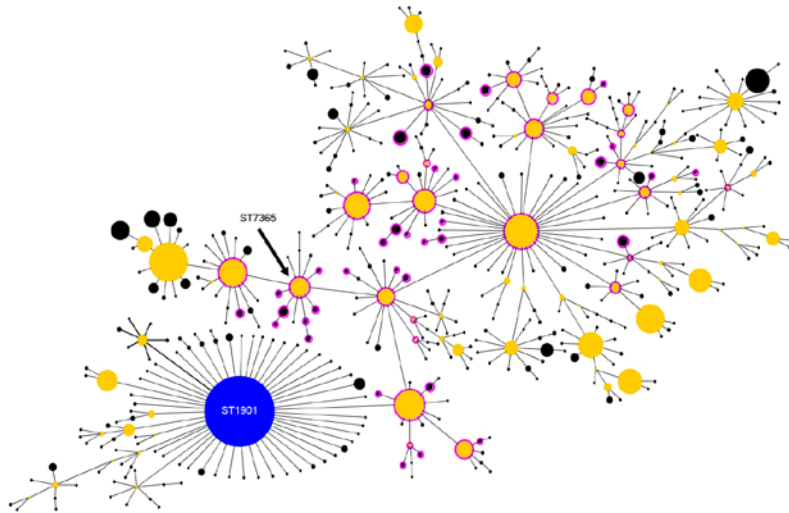

**Figure S2: eBURST analysis of 566 identified STs**

Group 1 of eBURST analysis of 4287 *N. gonorrhoeae* isolates in PubMLST database. The predicted founding genotype was coloured in blue, while subgroup founders were coloured in yellow. Pink 'halos' denoted STs which were found in this study. STs with single locus variance were linked with a solid line. Frequency of each ST was proportional to the size of circle. ST labels were hidden for clarity.



Tree scale: 0.1

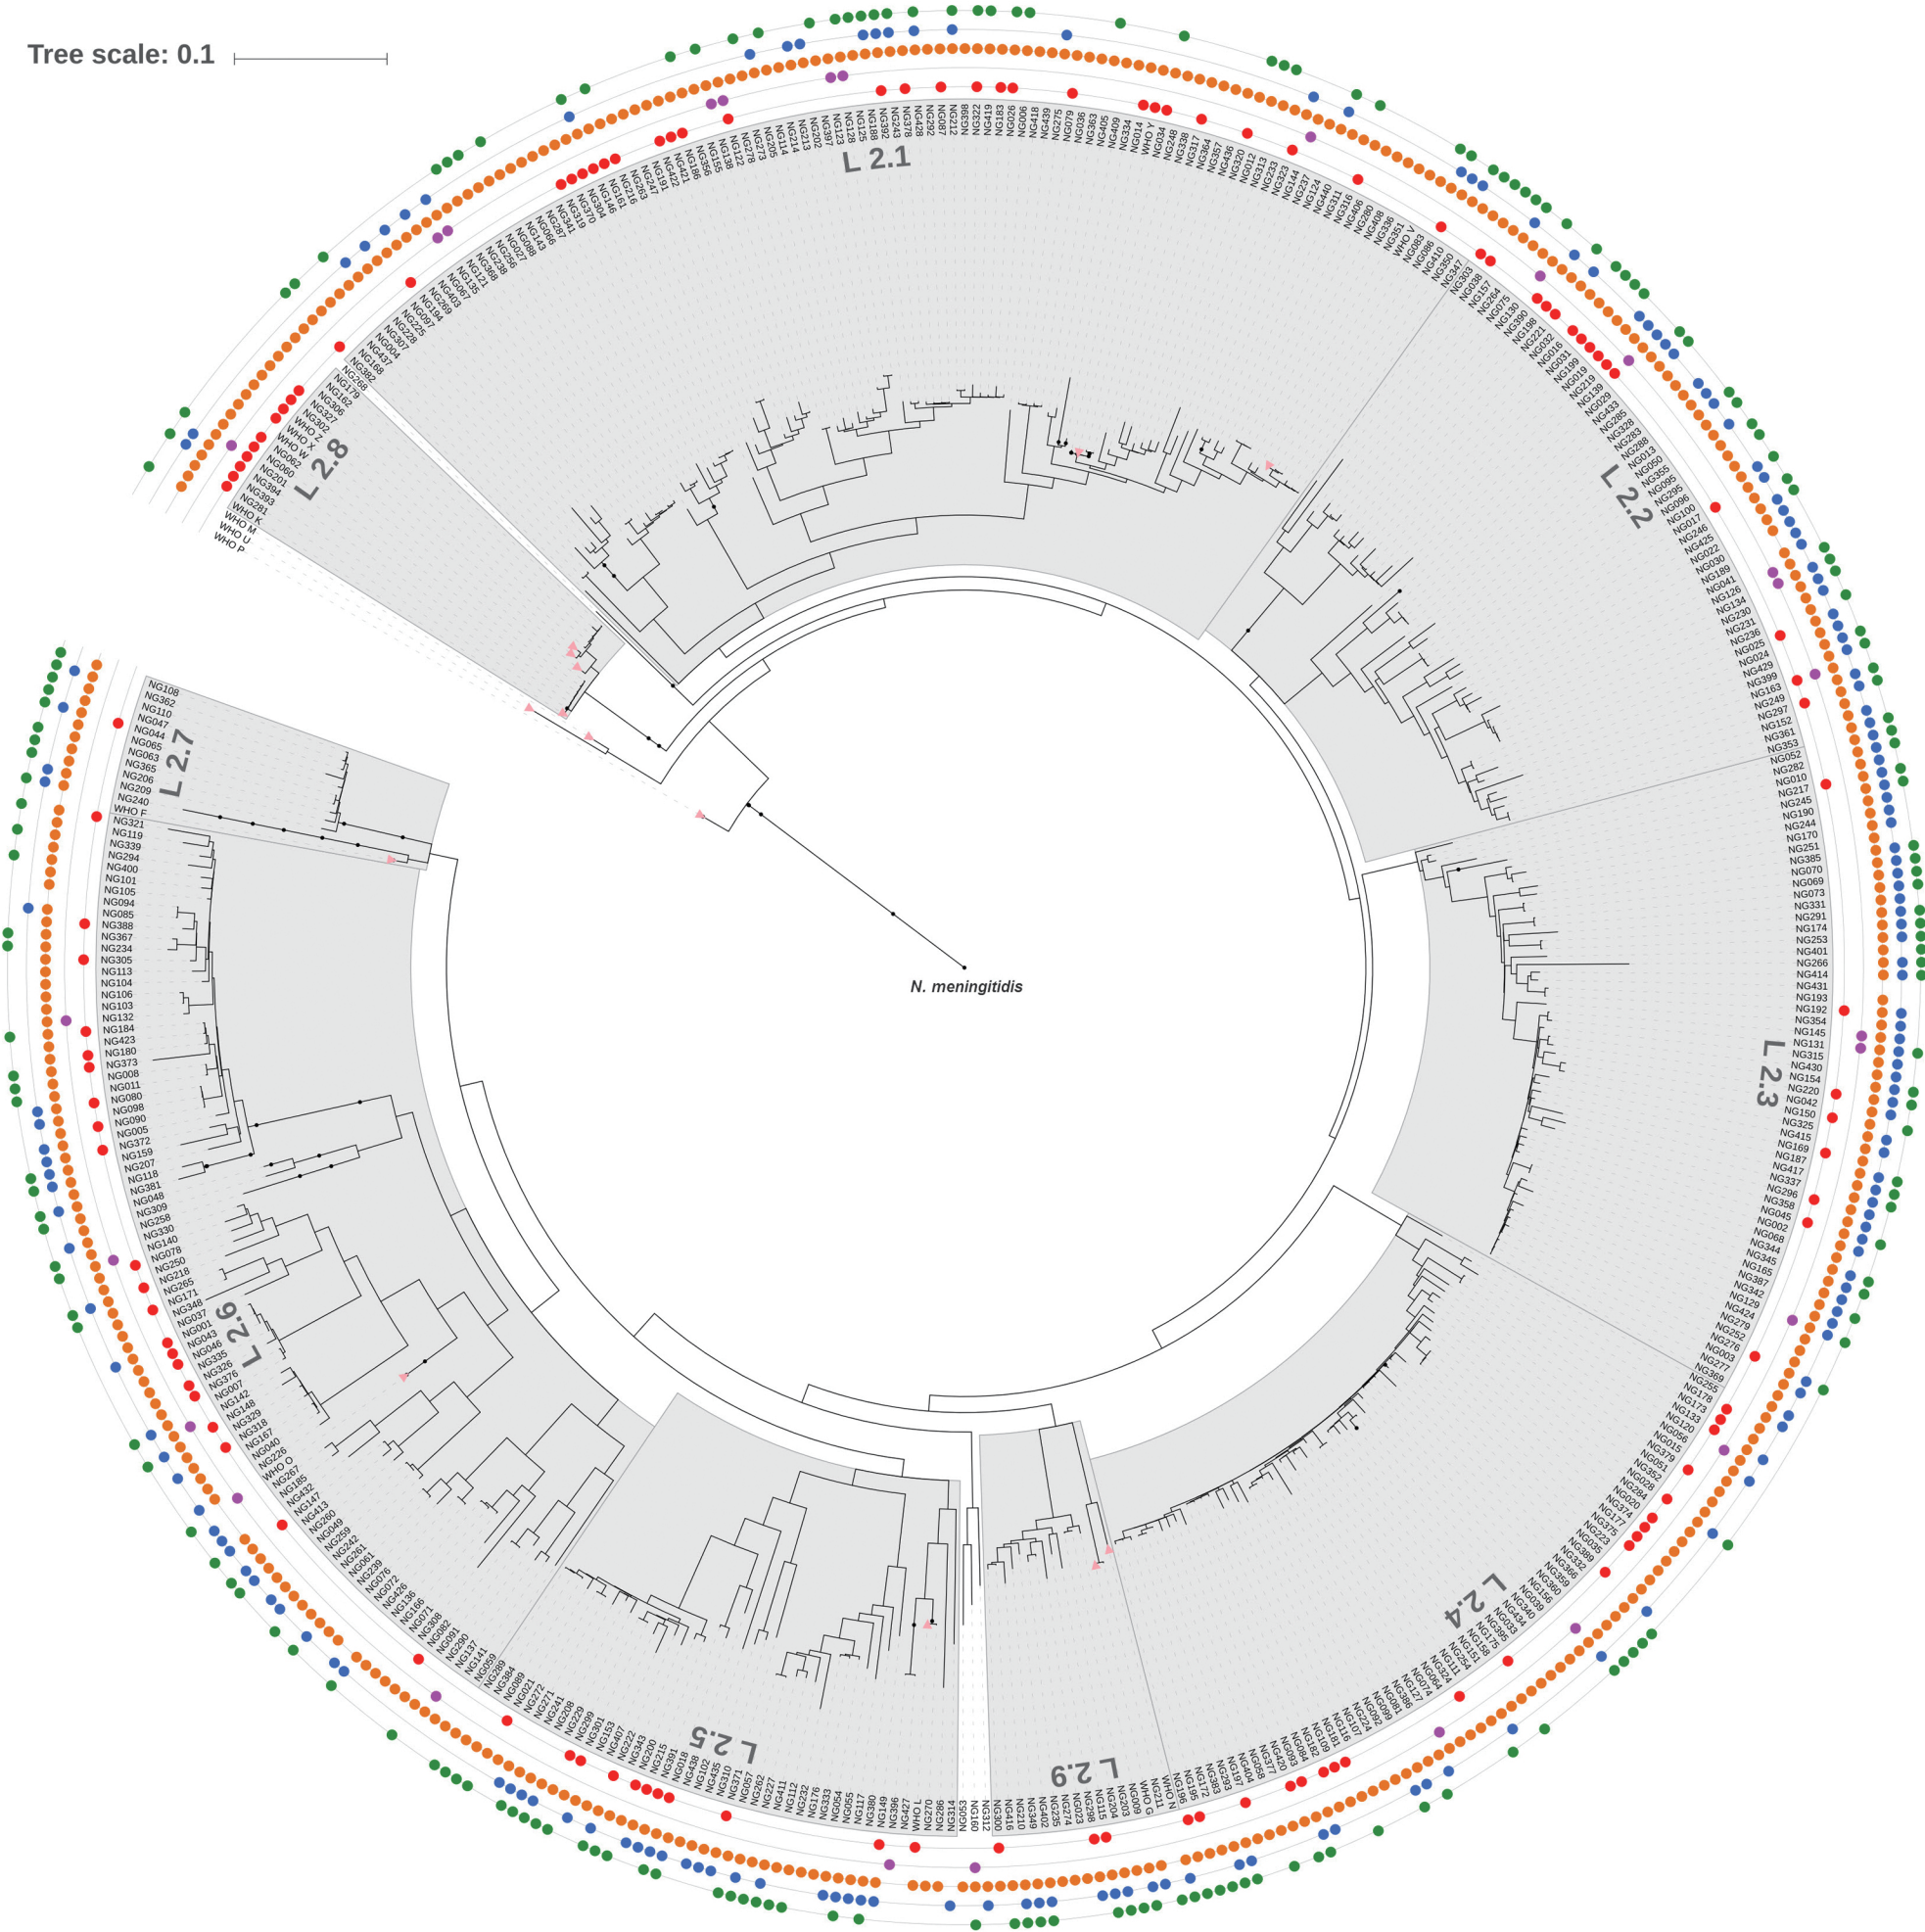

Figure S3



**Figure S3: The phylogenetic structure and antibiotics susceptibility details of 435**

**China *N. gonorrhoeae* strains.**

The maximum-likelihood tree was derived from Figure 1 with the same sub-lineages demarcation. The 14 newly sequenced representative strains from WHO are highlighted with pink triangles at the nodes. The antibiotics resistant details of each strain are indicated by external colored dots (from inner to outer): ceftriaxone (red), spectinomycin (purple), ciprofloxacin (orange), tetracycline (blue) and penicillin (green). The scale is in the units of mutations per site.
